# Supplementary material
Source: PubMed Central journal article supplement (PMC10015311)
Supplement: jama-e230878-s001.pdf [file jama-e230878-s001.pdf]

## Supplemental Online Content

Schoenbrunner A, Beckmeyer A, Kunnath N, et al. Association between California's state insurance gender nondiscrimination act and utilization of gender-affirming surgery. *JAMA*. Published March 14, 2023. doi:10.1001/jama.2023.0878

**eFigure.** Quandt Likelihood Ratio of Probability of Gender Affirming Surgery in California by Quarter

**eTable 1.** Diagnosis Codes for Gender Dysphoria

**eTable 2.** Procedure Codes for Face Surgery

**eTable 3.** Procedure Codes for Chest Surgery

**eTable 4.** Procedure Codes for Genital Surgery

This supplemental material has been provided by the authors to give readers additional information about their work.

**eFigure.** Quandt Likelihood Ratio of Probability of Gender Affirming Surgery in California by Quarter

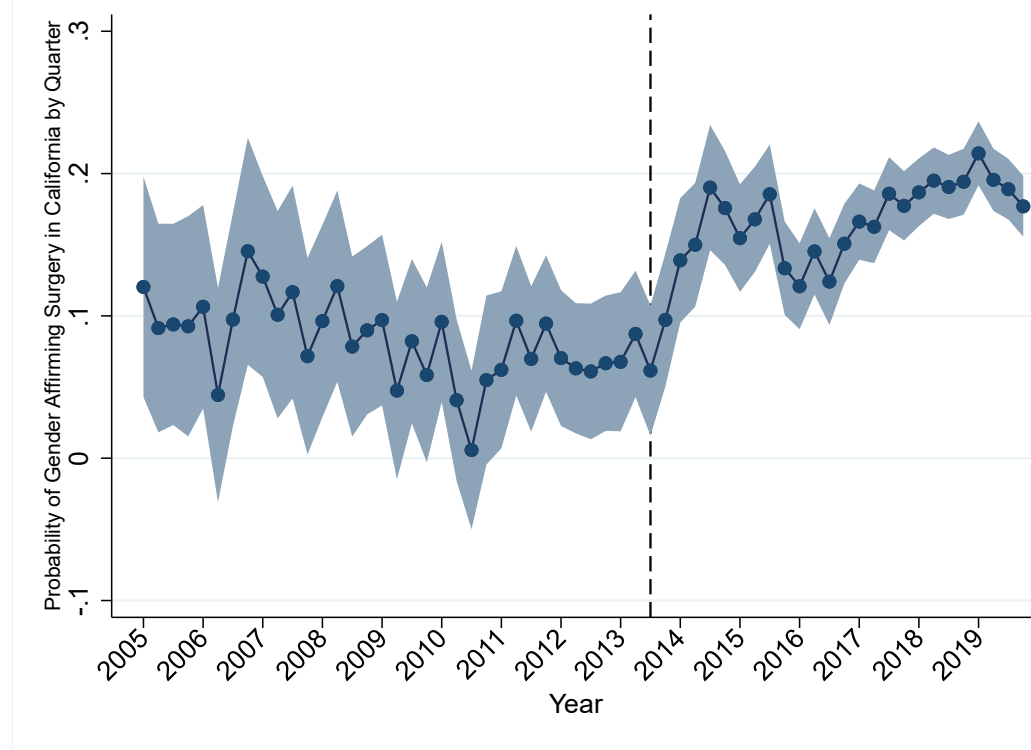

NOTES: Figure plots the trends in quarterly probability of undergoing gender affirming surgery for California residents between 2005–2020. The solid line and circles represent the point estimates for each quarter and the blue shaded area represents the 95% CI. Visually, we note a trend break in 2013, coincident with the implementation of IGNA. This break was confirmed econometrically using the Quandt Likelihood Ratio test ( $F = 57.24, p < 0.001$ ), assessing for the presence of breaks between 2005–2019.

**eTable 1. Diagnosis Codes for Gender Dysphoria**

| ICD9 Gender dysphoria dx code   |                                                       |
|---------------------------------|-------------------------------------------------------|
| 302.30                          | Transvestic fetishism                                 |
| 302.50                          | Transsexualism with unspecified sexual history        |
| 302.51                          | Transsexualism with asexual history                   |
| 302.52                          | Transsexualism with homosexual history                |
| 302.53                          | Transsexualism with heterosexual history              |
| 302.60                          | Gender Identity Disorder [GID] in children            |
| 302.85                          | GID in adolescents or adults                          |
| ICD10 gender dysphoria dx codes |                                                       |
| F65.1                           | Transvestic fetishism                                 |
| F64.0                           | Transsexualism                                        |
| F64.1                           | Gender identity disorder in adolescence and adulthood |
| F64.2                           | Gender identity disorder of childhood                 |
| F64.8                           | Other identity disorders                              |
| F64.9                           | Gender identity disorder, unspecified                 |
| Z87.890                         | Personal history of sex reassignment                  |

**eTable 2. Procedure Codes for Face Surgery**

| ICD9 Face Codes |                                                                                       |
|-----------------|---------------------------------------------------------------------------------------|
| 8.00            | Incision Of Eyelid                                                                    |
| 8.01            | Incision Of Lid Margin                                                                |
| 8.02            | Severing Of Blepharorrhaphy                                                           |
| 8.09            | Other Incision Of Eyelid                                                              |
| 8.3             | Repair Of Blepharoptosis And Lid Retraction                                           |
| 8.31            | Repair Of Blepharoptosis By Frontalis Muscle Technique With Suture                    |
| 8.32            | Repair Of Blepharoptosis By Frontalis Muscle Technique With Fascial Sling             |
| 8.33            | Repair Of Blepharoptosis By Resection Or Advancement Of Levator Muscle Or Aponeurosis |
| 8.34            | Repair Of Blepharoptosis By Other Levator Muscle Techniques                           |
| 8.35            | Repair Of Blepharoptosis By Tarsal Technique                                          |
| 8.36            | Repair Of Blepharoptosis By Other Techniques                                          |
| 8.37            | Reduction Of Overcorrection Of Ptosis                                                 |
| 8.38            | Correction Of Lid Retraction                                                          |
| 8.4             | Repair Of Entropion Or Ectropion                                                      |
| 8.41            | Repair Of Entropion Or Ectropion By Thermocauterization                               |
| 8.42            | Repair Of Entropion Or Ectropion By Suture Technique                                  |
| 8.43            | Repair Of Entropion Or Ectropion With Wedge Resection                                 |
| 8.44            | Repair Of Entropion Or Ectropion With Lid Reconstruction                              |
| 8.49            | Other Repair Of Entropion Or Ectropion                                                |
| 8.5             | Other Adjustment Of Lid Position                                                      |
| 8.51            | Canthotomy                                                                            |
| 8.52            | Blepharorrhaphy                                                                       |
| 8.7             | Other Reconstruction Of Eyelid                                                        |
| 8.8             | Other Repair Of Eyelid                                                                |
| 8.86            | Lower Eyelid Rhytidectomy                                                             |
| 8.87            | Upper Eyelid Rhytidectomy                                                             |
| 8.9             | Other Operations On Eyelids                                                           |
| 76.3            | Partial Osteotomy Of Facial Bone                                                      |
| 76.31           | Partial mandibulectomy                                                                |
| 76.39           | Partial osteotomy of other facial bone                                                |
| 76.43           | Other reconstruction of mandible                                                      |
| 76.44           | Total osteotomy of other facial bone with synchronous reconstruction                  |
| 76.45           | Other total osteotomy of other facial bone                                            |
| 76.46           | Other reconstruction of other facial bone                                             |
| 76.6            | Other Facial Bone Repair And Orthognathic Surgery                                     |
| 76.61           | Closed osteoplasty [osteotomy] of mandibular ramus                                    |
| 76.62           | Open osteoplasty [osteotomy] of mandibular ramus                                      |
| 76.63           | Osteoplasty [osteotomy] of body of mandible                                           |
| 76.64           | Other orthognathic surgery on mandible                                                |
| 76.65           | Segmental osteoplasty [osteotomy] of maxilla                                          |
| 76.66           | Total osteoplasty [osteotomy] of maxilla                                              |
| 76.67           | Reduction genioplasty                                                                 |
| 76.68           | Augmentation genioplasty                                                              |
| 76.69           | Other facial bone repair                                                              |
| 76.91           | Bone graft to facial bone                                                             |
| 76.92           | Insertion of synthetic implant in facial bone                                         |
| 86.82           | Facial rhytidectomy                                                                   |
| 21.5            | Submucous resection of nasal septum                                                   |
| 21.61           | Turbinectomy by diathermy or cryosurgery                                              |
| 21.62           | Fracture of the turbinates                                                            |
| 21.69           | Other turbinectomy                                                                    |
| 21.8            | Repair And Plastic Operations On The Nose                                             |

|                         |                                                                                    |
|-------------------------|------------------------------------------------------------------------------------|
| 21.84                   | Revision rhinoplasty                                                               |
| 21.85                   | Augmentation rhinoplasty                                                           |
| 21.86                   | Limited rhinoplasty                                                                |
| 31.99                   | Other operations on trachea                                                        |
| 31.79                   | Other repair and plastic operations on trachea                                     |
| 22.4                    | Frontal Sinusotomy And Sinusectomy                                                 |
| 22.41                   | Frontal Sinusotomy                                                                 |
| 22.42                   | Frontal Sinusectomy                                                                |
| <b>ICD10 Face codes</b> |                                                                                    |
| 080N0ZZ                 | Alteration of Right Upper Eyelid, Open Approach                                    |
| 080N3ZZ                 | Alteration of Right Upper Eyelid, Percutaneous Approach                            |
| 080NXZZ                 | Alteration of Right Upper Eyelid, External Approach                                |
| 080P0ZZ                 | Alteration of Left Upper Eyelid, Open Approach                                     |
| 080P3ZZ                 | Alteration of Left Upper Eyelid, Percutaneous Approach                             |
| 080PXZZ                 | Alteration of Left Upper Eyelid, External Approach                                 |
| 080Q0ZZ                 | Alteration of Right Lower Eyelid, Open Approach                                    |
| 080Q3ZZ                 | Alteration of Right Lower Eyelid, Percutaneous Approach                            |
| 080QXZZ                 | Alteration of Right Lower Eyelid, External Approach                                |
| 080R0ZZ                 | Alteration of Left Lower Eyelid, Open Approach                                     |
| 080R3ZZ                 | Alteration of Left Lower Eyelid, Percutaneous Approach                             |
| 080RXZZ                 | Alteration of Left Lower Eyelid, External Approach                                 |
| 090K0ZZ                 | Alteration of Nose, Open Approach                                                  |
| 090K3ZZ                 | Alteration of Nose, Percutaneous Approach                                          |
| 090K4ZZ                 | Alteration of Nose, Percutaneous Endoscopic Approach                               |
| 090KXZZ                 | Alteration of Nose, External Approach                                              |
| 09QM0ZZ                 | Repair Nasal Septum, Open Approach                                                 |
| 09QM3ZZ                 | Repair Nasal Septum, Percutaneous Approach                                         |
| 09QM4ZZ                 | Repair Nasal Septum, Percutaneous Endoscopic Approach                              |
| 0J040ZZ                 | Alteration of Anterior Neck Subcutaneous Tissue and Fascia, Open Approach          |
| 0J043ZZ                 | Alteration of Anterior Neck Subcutaneous Tissue and Fascia, Percutaneous Approach  |
| 0J043ZZ                 | Alteration of Anterior Neck Subcutaneous Tissue and Fascia, Percutaneous Approach  |
| 0J050ZZ                 | Alteration of Posterior Neck Subcutaneous Tissue and Fascia, Open Approach         |
| 0J053ZZ                 | Alteration of Posterior Neck Subcutaneous Tissue and Fascia, Percutaneous Approach |
| 08SN0ZZ                 | Reposition Right Upper Eyelid, Open Approach                                       |
| 08SN3ZZ                 | Reposition Right Upper Eyelid, Percutaneous Approach                               |
| 08SNXZZ                 | Reposition Right Upper Eyelid, External Approach                                   |
| 08SP0ZZ                 | Reposition Left Upper Eyelid, Open Approach                                        |
| 08SP3ZZ                 | Reposition Left Upper Eyelid, Percutaneous Approach                                |
| 08SPXZZ                 | Reposition Left Upper Eyelid, External Approach                                    |
| 08SQ0ZZ                 | Reposition Right Lower Eyelid, Open Approach                                       |
| 08SQ3ZZ                 | Reposition Right Lower Eyelid, Percutaneous Approach                               |
| 08SQXZZ                 | Reposition Right Lower Eyelid, External Approach                                   |
| 08SR0ZZ                 | Reposition Left Lower Eyelid, Open Approach                                        |
| 08SR3ZZ                 | Reposition Left Lower Eyelid, Percutaneous Approach                                |
| 08SRXZZ                 | Reposition Left Lower Eyelid, External Approach                                    |
| 0KS10ZZ                 | Reposition Facial Muscle, Open Approach                                            |
| 0KS14ZZ                 | Reposition Facial Muscle, Percutaneous Endoscopic Approach                         |
| 0NNC0ZZ                 | Release Right Sphenoid Bone, Open Approach                                         |
| 0NNC3ZZ                 | Release Right Sphenoid Bone, Percutaneous Approach                                 |
| 0NNC4ZZ                 | Release Right Sphenoid Bone, Percutaneous Endoscopic Approach                      |
| 0NNF0ZZ                 | Release Right Ethmoid Bone, Open Approach                                          |
| 0NNF3ZZ                 | Release Right Ethmoid Bone, Percutaneous Approach                                  |
| 0NNF4ZZ                 | Release Right Ethmoid Bone, Percutaneous Endoscopic Approach                       |
| 0NNG0ZZ                 | Release Left Ethmoid Bone, Open Approach                                           |
| 0NNG3ZZ                 | Release Left Ethmoid Bone, Percutaneous Approach                                   |
| 0NNG4ZZ                 | Release Left Ethmoid Bone, Percutaneous Endoscopic Approach                        |
| 0NNH0ZZ                 | Release Right Lacrimal Bone, Open Approach                                         |
| 0NNH3ZZ                 | Release Right Lacrimal Bone, Percutaneous Approach                                 |
| 0NNH4ZZ                 | Release Right Lacrimal Bone, Percutaneous Endoscopic Approach                      |
| 0NNJ0ZZ                 | Release Left Lacrimal Bone, Open Approach                                          |
| 0NNJ3ZZ                 | Release Left Lacrimal Bone, Percutaneous Approach                                  |
| 0NNJ4ZZ                 | Release Left Lacrimal Bone, Percutaneous Endoscopic Approach                       |
| 0NNK0ZZ                 | Release Right Palatine Bone, Open Approach                                         |
| 0NNK3ZZ                 | Release Right Palatine Bone, Percutaneous Approach                                 |
| 0NNK4ZZ                 | Release Right Palatine Bone, Percutaneous Endoscopic Approach                      |
| 0NNL0ZZ                 | Release Left Palatine Bone, Open Approach                                          |
| 0NNL3ZZ                 | Release Left Palatine Bone, Percutaneous Approach                                  |
| 0NNL4ZZ                 | Release Left Palatine Bone, Percutaneous Endoscopic Approach                       |
| 0NNM0ZZ                 | Release Right Zygomatic Bone, Open Approach                                        |
| 0NNM3ZZ                 | Release Right Zygomatic Bone, Percutaneous Approach                                |
| 0NNM4ZZ                 | Release Right Zygomatic Bone, Percutaneous Endoscopic Approach                     |

|          |                                                                                                        |
|----------|--------------------------------------------------------------------------------------------------------|
| 0NNN0ZZ  | Release Left Zygomatic Bone, Open Approach                                                             |
| 0NNN3ZZ  | Release Left Zygomatic Bone, Percutaneous Approach                                                     |
| 0NNN4ZZ  | Release Left Zygomatic Bone, Percutaneous Endoscopic Approach                                          |
| 0NNP0ZZ  | Release Right Orbit, Open Approach                                                                     |
| 0NNP3ZZ  | Release Right Orbit, Percutaneous Approach                                                             |
| 0NNP4ZZ  | Release Right Orbit, Percutaneous Endoscopic Approach                                                  |
| 0NNQ0ZZ  | Release Left Orbit, Open Approach                                                                      |
| 0NNQ3ZZ  | Release Left Orbit, Percutaneous Approach                                                              |
| 0NNQ4ZZ  | Release Left Orbit, Percutaneous Endoscopic Approach                                                   |
| 0NNR0ZZ  | Release Right Maxilla, Open Approach                                                                   |
| 0NNR3ZZ  | Release Right Maxilla, Percutaneous Approach                                                           |
| 0NNR4ZZ  | Release Right Maxilla, Percutaneous Endoscopic Approach                                                |
| 0NNT0ZZ  | Release Right Mandible, Open Approach                                                                  |
| 0NNT3ZZ  | Release Right Mandible, Percutaneous Approach                                                          |
| 0NNT4ZZ  | Release Right Mandible, Percutaneous Endoscopic Approach                                               |
| 0NNV0ZZ  | Release Left Mandible, Open Approach                                                                   |
| 0NNV3ZZ  | Release Left Mandible, Percutaneous Approach                                                           |
| 0NNV4ZZ  | Release Left Mandible, Percutaneous Endoscopic Approach                                                |
| 0NQC0ZZ  | Repair Right Sphenoid Bone, Open Approach                                                              |
| 0NQC3ZZ  | Repair Right Sphenoid Bone, Percutaneous Approach                                                      |
| 0NQC4ZZ  | Repair Right Sphenoid Bone, Percutaneous Endoscopic Approach                                           |
| 0NQCXZZ  | Repair Right Sphenoid Bone, External Approach                                                          |
| 0NQF0ZZ  | Repair Right Ethmoid Bone, Open Approach                                                               |
| 0NQF3ZZ  | Repair Right Ethmoid Bone, Percutaneous Approach                                                       |
| 0NQF4ZZ  | Repair Right Ethmoid Bone, Percutaneous Endoscopic Approach                                            |
| 0NQFXZZ  | Repair Right Ethmoid Bone, External Approach                                                           |
| 0NQG0ZZ  | Repair Left Ethmoid Bone, Open Approach                                                                |
| 0NQG3ZZ  | Repair Left Ethmoid Bone, Percutaneous Approach                                                        |
| 0NQG4ZZ  | Repair Left Ethmoid Bone, Percutaneous Endoscopic Approach                                             |
| 0NQGXXZZ | Repair Left Ethmoid Bone, External Approach                                                            |
| 0NQH0ZZ  | Repair Right Lacrimal Bone, Open Approach                                                              |
| 0NQH3ZZ  | Repair Right Lacrimal Bone, Percutaneous Approach                                                      |
| 0NQH4ZZ  | Repair Right Lacrimal Bone, Percutaneous Endoscopic Approach                                           |
| 0NQHXZZ  | Repair Right Lacrimal Bone, External Approach                                                          |
| 0NQJ0ZZ  | Repair Left Lacrimal Bone, Open Approach                                                               |
| 0NQJ3ZZ  | Repair Left Lacrimal Bone, Percutaneous Approach                                                       |
| 0NQJ4ZZ  | Repair Left Lacrimal Bone, Percutaneous Endoscopic Approach                                            |
| 0NQJXZZ  | Repair Left Lacrimal Bone, External Approach Repair Left Lacrimal Bone, External Approach              |
| 0NQK0ZZ  | Repair Right Palatine Bone, Open Approach                                                              |
| 0NQK3ZZ  | Repair Right Palatine Bone, Percutaneous Approach                                                      |
| 0NQK4ZZ  | Repair Right Palatine Bone, Percutaneous Endoscopic Approach                                           |
| 0NQKXZZ  | Repair Right Palatine Bone, External Approach                                                          |
| 0NQL0ZZ  | Repair Left Palatine Bone, Open Approach                                                               |
| 0NQL3ZZ  | Repair Left Palatine Bone, Percutaneous Approach                                                       |
| 0NQL4ZZ  | Repair Left Palatine Bone, Percutaneous Endoscopic Approach                                            |
| 0NQLXZZ  | Repair Left Palatine Bone, External Approach                                                           |
| 0NQM0ZZ  | Repair Right Zygomatic Bone, Open Approach                                                             |
| 0NQM3ZZ  | Repair Right Zygomatic Bone, Percutaneous Approach                                                     |
| 0NQM4ZZ  | Repair Right Zygomatic Bone, Percutaneous Endoscopic Approach                                          |
| 0NQMXZZ  | Repair Right Zygomatic Bone, External Approach                                                         |
| 0NQN0ZZ  | Repair Left Zygomatic Bone, Open Approach                                                              |
| 0NQN3ZZ  | Repair Left Zygomatic Bone, Percutaneous Approach                                                      |
| 0NQN4ZZ  | Repair Left Zygomatic Bone, Percutaneous Endoscopic Approach                                           |
| 0NQNXZZ  | Repair Left Zygomatic Bone, External Approach                                                          |
| 0NQX0ZZ  | Repair Hyoid Bone, Open Approach                                                                       |
| 0NQX3ZZ  | Repair Hyoid Bone, Percutaneous Approach                                                               |
| 0NQX4ZZ  | Repair Hyoid Bone, Percutaneous Endoscopic Approach                                                    |
| 0NQXXZZ  | Repair Hyoid Bone, External Approach                                                                   |
| 0NRC07Z  | Replacement of Right Sphenoid Bone with Autologous Tissue Substitute, Open Approach                    |
| 0NRC0JZ  | Replacement of Right Sphenoid Bone with Synthetic Substitute, Open Approach                            |
| 0NRC0KZ  | Replacement of Right Sphenoid Bone with Nonautologous Tissue Substitute, Open Approach                 |
| 0NRC37Z  | Replacement of Right Sphenoid Bone with Autologous Tissue Substitute, Percutaneous Approach            |
| 0NRC3JZ  | Replacement of Right Sphenoid Bone with Synthetic Substitute, Percutaneous Approach                    |
| 0NRC3KZ  | Replacement of Right Sphenoid Bone with Nonautologous Tissue Substitute, Percutaneous Approach         |
| 0NRC47Z  | Replacement of Right Sphenoid Bone with Autologous Tissue Substitute, Percutaneous Endoscopic Approach |
| 0NRC4JZ  | Replacement of Right Sphenoid Bone with Synthetic Substitute, Percutaneous Endoscopic Approach         |

|         |                                                                                                           |
|---------|-----------------------------------------------------------------------------------------------------------|
| 0NRC4KZ | Replacement of Right Sphenoid Bone with Nonautologous Tissue Substitute, Percutaneous Endoscopic Approach |
| 0NRF07Z | Replacement of Right Ethmoid Bone with Autologous Tissue Substitute, Open Approach                        |
| 0NRF0JZ | Replacement of Right Ethmoid Bone with Synthetic Substitute, Open Approach                                |
| 0NRF0KZ | Replacement of Right Ethmoid Bone with Nonautologous Tissue Substitute, Open Approach                     |
| 0NRF37Z | Replacement of Right Ethmoid Bone with Autologous Tissue Substitute, Percutaneous Approach                |
| 0NRF3JZ | Replacement of Right Ethmoid Bone with Synthetic Substitute, Percutaneous Approach                        |
| 0NRF3KZ | Replacement of Right Ethmoid Bone with Nonautologous Tissue Substitute, Percutaneous Approach             |
| 0NRF47Z | Replacement of Right Ethmoid Bone with Autologous Tissue Substitute, Percutaneous Endoscopic Approach     |
| 0NRF4JZ | Replacement of Right Ethmoid Bone with Synthetic Substitute, Percutaneous Endoscopic Approach             |
| 0NRF4KZ | Replacement of Right Ethmoid Bone with Nonautologous Tissue Substitute, Percutaneous Endoscopic Approach  |
| 0NRG07Z | Replacement of Left Ethmoid Bone with Autologous Tissue Substitute, Open Approach                         |
| 0NRG0JZ | Replacement of Left Ethmoid Bone with Synthetic Substitute, Open Approach                                 |
| 0NRG0KZ | Replacement of Left Ethmoid Bone with Nonautologous Tissue Substitute, Open Approach                      |
| 0NRG37Z | Replacement of Left Ethmoid Bone with Autologous Tissue Substitute, Percutaneous Approach                 |
| 0NRG3JZ | Replacement of Left Ethmoid Bone with Synthetic Substitute, Percutaneous Approach                         |
| 0NRG3KZ | Replacement of Left Ethmoid Bone with Nonautologous Tissue Substitute, Percutaneous Approach              |
| 0NRG47Z | Replacement of Left Ethmoid Bone with Autologous Tissue Substitute, Percutaneous Endoscopic Approach      |
| 0NRG4JZ | Replacement of Left Ethmoid Bone with Synthetic Substitute, Percutaneous Endoscopic Approach              |
| 0NRG4KZ | Replacement of Left Ethmoid Bone with Nonautologous Tissue Substitute, Percutaneous Endoscopic Approach   |
| 0NRH07Z | Replacement of Right Lacrimal Bone with Autologous Tissue Substitute, Open Approach                       |
| 0NRH0JZ | Replacement of Right Lacrimal Bone with Synthetic Substitute, Open Approach                               |
| 0NRH0KZ | Replacement of Right Lacrimal Bone with Nonautologous Tissue Substitute, Open Approach                    |
| 0NRH37Z | Replacement of Right Lacrimal Bone with Autologous Tissue Substitute, Percutaneous Approach               |
| 0NRH3JZ | Replacement of Right Lacrimal Bone with Synthetic Substitute, Percutaneous Approach                       |
| 0NRH3KZ | Replacement of Right Lacrimal Bone Percutaneous with Nonautologous Tissue Substitute, Approach            |
| 0NRH47Z | Replacement of Right Lacrimal Bone Endoscopic with Autologous Tissue Substitute, Percutaneous Approach    |
| 0NRH4JZ | Replacement of Right Lacrimal Bone Endoscopic with Synthetic Substitute, Percutaneous Approach            |
| 0NRH4KZ | Replacement of Right Lacrimal Bone Percutaneous Endoscopic with Nonautologous Tissue Substitute, Approach |
| 0NRJ07Z | Replacement of Left Lacrimal Bone with Autologous Tissue Substitute, Open Approach                        |
| 0NRJ0JZ | Replacement of Left Lacrimal Bone with Synthetic Substitute, Open Approach                                |
| 0NRJ0KZ | Replacement of Left Lacrimal Bone with Nonautologous Tissue Substitute, Open Approach                     |
| 0NRJ37Z | Replacement of Left Lacrimal Bone with Autologous Tissue Substitute, Percutaneous Approach                |
| 0NRJ3JZ | Replacement of Left Lacrimal Bone with Synthetic Substitute, Percutaneous Approach                        |
| 0NRJ3KZ | Replacement of Left Lacrimal Bone with Nonautologous Tissue Substitute, Percutaneous Approach             |
| 0NRJ47Z | Replacement of Left Lacrimal Bone with Autologous Tissue Substitute, Percutaneous Endoscopic Approach     |
| 0NRJ4JZ | Replacement of Left Lacrimal Bone with Synthetic Substitute, Percutaneous Endoscopic Approach             |
| 0NRJ4KZ | Replacement of Left Lacrimal Bone with Nonautologous Tissue Substitute, Percutaneous Endoscopic Approach  |
| 0NRK07Z | Replacement of Right Palatine Bone with Autologous Tissue Substitute, Open Approach                       |
| 0NRK0JZ | Replacement of Right Palatine Bone with Synthetic Substitute, Open Approach                               |
| 0NRK0KZ | Replacement of Right Palatine Bone with Nonautologous Tissue Substitute, Open Approach                    |
| 0NRK37Z | Replacement of Right Palatine Bone with Autologous Tissue Substitute, Percutaneous Approach               |
| 0NRK3JZ | Replacement of Right Palatine Bone with Synthetic Substitute, Percutaneous Approach                       |
| 0NRK3KZ | Replacement of Right Palatine Bone with Nonautologous Tissue Substitute, Percutaneous Approach            |
| 0NRK47Z | Replacement of Right Palatine Bone with Autologous Tissue Substitute, Percutaneous Endoscopic Approach    |
| 0NRK4JZ | Replacement of Right Palatine Bone with Synthetic Substitute, Percutaneous Endoscopic Approach            |
| 0NRK4KZ | Replacement of Right Palatine Bone with Nonautologous Tissue Substitute, Percutaneous Endoscopic Approach |
| 0NRL07Z | Replacement of Left Palatine Bone with Autologous Tissue Substitute, Open Approach                        |
| 0NRL0JZ | Replacement of Left Palatine Bone with Synthetic Substitute, Open Approach                                |
| 0NRL0KZ | Replacement of Left Palatine Bone with Nonautologous Tissue Substitute, Open Approach                     |
| 0NRL37Z | Replacement of Left Palatine Bone with Autologous Tissue Substitute, Percutaneous Approach                |
| 0NRL3JZ | Replacement of Left Palatine Bone with Synthetic Substitute, Percutaneous Approach                        |
| 0NRL3KZ | Replacement of Left Palatine Bone with Nonautologous Tissue Substitute, Percutaneous Approach             |

|         |                                                                                                            |
|---------|------------------------------------------------------------------------------------------------------------|
| 0NRL47Z | Replacement of Left Palatine Bone with Autologous Tissue Substitute, Percutaneous Endoscopic Approach      |
| 0NRL4JZ | Replacement of Left Palatine Bone with Synthetic Substitute, Percutaneous Endoscopic Approach              |
| 0NRL4KZ | Replacement of Left Palatine Bone with Nonautologous Tissue Substitute, Percutaneous Endoscopic Approach   |
| 0NRM07Z | Replacement of Right Zygomatic Bone with Autologous Tissue Substitute, Open Approach                       |
| 0NRM0JZ | Replacement of Right Zygomatic Bone with Synthetic Substitute, Open Approach                               |
| 0NRM0KZ | Replacement of Right Zygomatic Bone with Nonautologous Tissue Substitute, Open Approach                    |
| 0NRM37Z | Replacement of Right Zygomatic Bone with Autologous Tissue Substitute, Percutaneous Approach               |
| 0NRM3JZ | Replacement of Right Zygomatic Bone with Synthetic Substitute, Percutaneous Approach                       |
| 0NRM3KZ | Replacement of Right Zygomatic Bone with Nonautologous Tissue Substitute, Percutaneous Approach            |
| 0NRM47Z | Replacement of Right Zygomatic Bone with Autologous Tissue Substitute, Percutaneous Endoscopic Approach    |
| 0NRM4JZ | Replacement of Right Zygomatic Bone with Synthetic Substitute, Percutaneous Endoscopic Approach            |
| 0NRM4KZ | Replacement of Right Zygomatic Bone with Nonautologous Tissue Substitute, Percutaneous Endoscopic Approach |
| 0NRN07Z | Replacement of Left Zygomatic Bone with Autologous Tissue Substitute, Open Approach                        |
| 0NRN0JZ | Replacement of Left Zygomatic Bone with Synthetic Substitute, Open Approach                                |
| 0NRN0KZ | Replacement of Left Zygomatic Bone with Nonautologous Tissue Substitute, Open Approach                     |
| 0NRN37Z | Replacement of Left Zygomatic Bone with Autologous Tissue Substitute, Percutaneous Approach                |
| 0NRN3JZ | Replacement of Left Zygomatic Bone with Synthetic Substitute, Percutaneous Approach                        |
| 0NRN3KZ | Replacement of Left Zygomatic Bone with Nonautologous Tissue Substitute, Percutaneous Approach             |
| 0NRN47Z | Replacement of Left Zygomatic Bone with Autologous Tissue Substitute, Percutaneous Endoscopic Approach     |
| 0NRN4JZ | Replacement of Left Zygomatic Bone with Synthetic Substitute, Percutaneous Endoscopic Approach             |
| 0NRN4KZ | Replacement of Left Zygomatic Bone with Nonautologous Tissue Substitute, Percutaneous Endoscopic Approach  |
| 0NRP0KZ | Replacement of Right Orbit with Nonautologous Tissue Substitute, Open Approach                             |
| 0NRP3KZ | Replacement of Right Orbit with Nonautologous Tissue Substitute, Percutaneous Approach                     |
| 0NRP4KZ | Replacement of Right Orbit with Nonautologous Tissue Substitute, Percutaneous Endoscopic Approach          |
| 0NRQ0KZ | Replacement of Left Orbit with Nonautologous Tissue Substitute, Open Approach                              |
| 0NRQ3KZ | Replacement of Left Orbit with Nonautologous Tissue Substitute, Percutaneous Approach                      |
| 0NRQ4KZ | Replacement of Left Orbit with Nonautologous Tissue Substitute, Percutaneous Endoscopic Approach           |
| 0NRR07Z | Replacement of Right Maxilla with Autologous Tissue Substitute, Open Approach                              |
| 0NRR0JZ | Replacement of Right Maxilla with Synthetic Substitute, Open Approach                                      |
| 0NRR0KZ | Replacement of Right Maxilla with Nonautologous Tissue Substitute, Open Approach                           |
| 0NRR37Z | Replacement of Right Maxilla with Autologous Tissue Substitute, Percutaneous Approach                      |
| 0NRR3JZ | Replacement of Right Maxilla with Synthetic Substitute, Percutaneous Approach                              |
| 0NRR3KZ | Replacement of Right Maxilla with Nonautologous Tissue Substitute, Percutaneous Approach                   |
| 0NRR47Z | Replacement of Right Maxilla with Autologous Tissue Substitute, Percutaneous Endoscopic Approach           |
| 0NRR4JZ | Replacement of Right Maxilla with Synthetic Substitute, Percutaneous Endoscopic Approach                   |
| 0NRR4KZ | Replacement of Right Maxilla with Nonautologous Tissue Substitute, Percutaneous Endoscopic Approach        |
| 0NRX07Z | Replacement of Hyoid Bone with Autologous Tissue Substitute, Open Approach                                 |
| 0NRX0JZ | Replacement of Hyoid Bone with Synthetic Substitute, Open Approach                                         |
| 0NRX0KZ | Replacement of Hyoid Bone with Nonautologous Tissue Substitute, Open Approach                              |
| 0NRX37Z | Replacement of Hyoid Bone with Autologous Tissue Substitute, Percutaneous Approach                         |
| 0NRX3JZ | Replacement of Hyoid Bone with Synthetic Substitute, Percutaneous Approach                                 |
| 0NRX3KZ | Replacement of Hyoid Bone with Nonautologous Tissue Substitute, Percutaneous Approach                      |
| 0NRX47Z | Replacement of Hyoid Bone with Autologous Tissue Substitute, Percutaneous Endoscopic Approach              |
| 0NRX4JZ | Replacement of Hyoid Bone with Synthetic Substitute, Percutaneous Endoscopic Approach                      |
| 0NRX4KZ | Replacement of Hyoid Bone with Nonautologous Tissue Substitute, Percutaneous Endoscopic Approach           |
| 0NUC07Z | Supplement Right Sphenoid Bone with Autologous Tissue Substitute, Open Approach                            |
| 0NUC0JZ | Supplement Right Sphenoid Bone with Synthetic Substitute, Open Approach                                    |
| 0NUC0KZ | Supplement Right Sphenoid Bone with Nonautologous Tissue Substitute, Open Approach                         |
| 0NUC37Z | Supplement Right Sphenoid Bone with Autologous Tissue Substitute, Percutaneous Approach                    |
| 0NUC3JZ | Supplement Right Sphenoid Bone with Synthetic Substitute, Percutaneous Approach                            |
| 0NUC3KZ | Supplement Right Sphenoid Bone with Nonautologous Tissue Substitute, Percutaneous Approach                 |
| 0NUC47Z | Supplement Right Sphenoid Bone with Autologous Tissue Substitute, Percutaneous Endoscopic Approach         |
| 0NUC4JZ | Supplement Right Sphenoid Bone with Synthetic Substitute, Percutaneous Endoscopic Approach                 |
| 0NUC4KZ | Supplement Right Sphenoid Bone with Nonautologous Tissue Substitute, Percutaneous Endoscopic Approach      |

|         |                                                                                                       |
|---------|-------------------------------------------------------------------------------------------------------|
| 0NUF07Z | Supplement Right Ethmoid Bone with Autologous Tissue Substitute, Open Approach                        |
| 0NUF0JZ | Supplement Right Ethmoid Bone with Synthetic Substitute, Open Approach                                |
| 0NUF0KZ | Supplement Right Ethmoid Bone with Nonautologous Tissue Substitute, Open Approach                     |
| 0NUF37Z | Supplement Right Ethmoid Bone with Autologous Tissue Substitute, Percutaneous Approach                |
| 0NUF3JZ | Supplement Right Ethmoid Bone with Synthetic Substitute, Percutaneous Approach                        |
| 0NUF3KZ | Supplement Right Ethmoid Bone with Nonautologous Tissue Substitute, Percutaneous Approach             |
| 0NUF47Z | Supplement Right Ethmoid Bone with Autologous Tissue Substitute, Percutaneous Endoscopic Approach     |
| 0NUF4JZ | Supplement Right Ethmoid Bone with Synthetic Substitute, Percutaneous Endoscopic Approach             |
| 0NUF4KZ | Supplement Right Ethmoid Bone with Nonautologous Tissue Substitute, Percutaneous Endoscopic Approach  |
| 0NUG07Z | Supplement Left Ethmoid Bone with Autologous Tissue Substitute, Open Approach                         |
| 0NUG0JZ | Supplement Left Ethmoid Bone with Synthetic Substitute, Open Approach                                 |
| 0NUG0KZ | Supplement Left Ethmoid Bone with Nonautologous Tissue Substitute, Open Approach                      |
| 0NUG37Z | Supplement Left Ethmoid Bone with Autologous Tissue Substitute, Percutaneous Approach                 |
| 0NUG3JZ | Supplement Left Ethmoid Bone with Synthetic Substitute, Percutaneous Approach                         |
| 0NUG3KZ | Supplement Left Ethmoid Bone with Nonautologous Tissue Substitute, Percutaneous Approach              |
| 0NUG47Z | Supplement Left Ethmoid Bone with Autologous Tissue Substitute, Percutaneous Endoscopic Approach      |
| 0NUG4JZ | Supplement Left Ethmoid Bone with Synthetic Substitute, Percutaneous Endoscopic Approach              |
| 0NUG4KZ | Supplement Left Ethmoid Bone with Nonautologous Tissue Substitute, Percutaneous Endoscopic Approach   |
| 0NUH07Z | Supplement Right Lacrimal Bone with Autologous Tissue Substitute, Open Approach                       |
| 0NUH0JZ | Supplement Right Lacrimal Bone with Synthetic Substitute, Open Approach                               |
| 0NUH0KZ | Supplement Right Lacrimal Bone with Nonautologous Tissue Substitute, Open Approach                    |
| 0NUH37Z | Supplement Right Lacrimal Bone with Autologous Tissue Substitute, Percutaneous Approach               |
| 0NUH3JZ | Supplement Right Lacrimal Bone with Synthetic Substitute, Percutaneous Approach                       |
| 0NUH3KZ | Supplement Right Lacrimal Bone with Nonautologous Tissue Substitute, Percutaneous Approach            |
| 0NUH47Z | Supplement Right Lacrimal Bone with Autologous Tissue Substitute, Percutaneous Endoscopic Approach    |
| 0NUH4JZ | Supplement Right Lacrimal Bone with Synthetic Substitute, Percutaneous Endoscopic Approach            |
| 0NUH4KZ | Supplement Right Lacrimal Bone with Nonautologous Tissue Substitute, Percutaneous Endoscopic Approach |
| 0NUJ07Z | Supplement Left Lacrimal Bone with Autologous Tissue Substitute, Open Approach                        |
| 0NUJ0JZ | Supplement Left Lacrimal Bone with Synthetic Substitute, Open Approach                                |
| 0NUJ0KZ | Supplement Left Lacrimal Bone with Nonautologous Tissue Substitute, Open Approach                     |
| 0NUJ37Z | Supplement Left Lacrimal Bone with Autologous Tissue Substitute, Percutaneous Approach                |
| 0NUJ3JZ | Supplement Left Lacrimal Bone with Synthetic Substitute, Percutaneous Approach                        |
| 0NUJ3KZ | Supplement Left Lacrimal Bone with Nonautologous Tissue Substitute, Percutaneous Approach             |
| 0NUJ47Z | Supplement Left Lacrimal Bone with Autologous Tissue Substitute, Percutaneous Endoscopic Approach     |
| 0NUJ4JZ | Supplement Left Lacrimal Bone with Synthetic Substitute, Percutaneous Endoscopic Approach             |
| 0NUJ4KZ | Supplement Left Lacrimal Bone with Nonautologous Tissue Substitute, Percutaneous Endoscopic Approach  |
| 0NUK07Z | Supplement Right Palatine Bone with Autologous Tissue Substitute, Open Approach                       |
| 0NUK0JZ | Supplement Right Palatine Bone with Synthetic Substitute, Open Approach                               |
| 0NUK0KZ | Supplement Right Palatine Bone with Nonautologous Tissue Substitute, Open Approach                    |
| 0NUK37Z | Supplement Right Palatine Bone with Autologous Tissue Substitute, Percutaneous Approach               |
| 0NUK3JZ | Supplement Right Palatine Bone with Synthetic Substitute, Percutaneous Approach                       |
| 0NUK3KZ | Supplement Right Palatine Bone with Nonautologous Tissue Substitute, Percutaneous Approach            |
| 0NUK47Z | Supplement Right Palatine Bone with Autologous Tissue Substitute, Percutaneous Endoscopic Approach    |
| 0NUK4JZ | Supplement Right Palatine Bone with Synthetic Substitute, Percutaneous Endoscopic Approach            |
| 0NUK4KZ | Supplement Right Palatine Bone with Nonautologous Tissue Substitute, Percutaneous Endoscopic Approach |
| 0NUL07Z | Supplement Left Palatine Bone with Autologous Tissue Substitute, Open Approach                        |
| 0NUL0JZ | Supplement Left Palatine Bone with Synthetic Substitute, Open Approach                                |
| 0NUL0KZ | Supplement Left Palatine Bone with Nonautologous Tissue Substitute, Open Approach                     |
| 0NUL37Z | Supplement Left Palatine Bone with Autologous Tissue Substitute, Percutaneous Approach                |
| 0NUL3JZ | Supplement Left Palatine Bone with Synthetic Substitute, Percutaneous Approach                        |
| 0NUL3KZ | Supplement Left Palatine Bone with Nonautologous Tissue Substitute, Percutaneous Approach             |
| 0NUL47Z | Supplement Left Palatine Bone with Autologous Tissue Substitute, Percutaneous Endoscopic Approach     |
| 0NUL4JZ | Supplement Left Palatine Bone with Synthetic Substitute, Percutaneous Endoscopic Approach             |
| 0NUL4KZ | Supplement Left Palatine Bone with Nonautologous Tissue Substitute, Percutaneous Endoscopic Approach  |
| 0NUM07Z | Supplement Right Zygomatic Bone with Autologous Tissue Substitute, Open Approach                      |
| 0NUM0JZ | Supplement Right Zygomatic Bone with Synthetic Substitute, Open Approach                              |
| 0NUM0KZ | Supplement Right Zygomatic Bone with Nonautologous Tissue Substitute, Open Approach                   |



|         |                                                                                                        |
|---------|--------------------------------------------------------------------------------------------------------|
| 0NUM37Z | Supplement Right Zygomatic Bone with Autologous Tissue Substitute, Percutaneous Approach               |
| 0NUM3JZ | Supplement Right Zygomatic Bone with Synthetic Substitute, Percutaneous Approach                       |
| 0NUM3KZ | Supplement Right Zygomatic Bone with Nonautologous Tissue Substitute, Percutaneous Approach            |
| 0NUM47Z | Supplement Right Zygomatic Bone with Autologous Tissue Substitute, Percutaneous Endoscopic Approach    |
| 0NUM4JZ | Supplement Right Zygomatic Bone with Synthetic Substitute, Percutaneous Endoscopic Approach            |
| 0NUM4KZ | Supplement Right Zygomatic Bone with Nonautologous Tissue Substitute, Percutaneous Endoscopic Approach |
| 0NUN07Z | Supplement Left Zygomatic Bone with Autologous Tissue Substitute, Open Approach                        |
| 0NUN0JZ | Supplement Left Zygomatic Bone with Synthetic Substitute, Open Approach                                |
| 0NUN0KZ | Supplement Left Zygomatic Bone with Nonautologous Tissue Substitute, Open Approach                     |
| 0NUN37Z | Supplement Left Zygomatic Bone with Autologous Tissue Substitute, Percutaneous Approach                |
| 0NUN3JZ | Supplement Left Zygomatic Bone with Synthetic Substitute, Percutaneous Approach                        |
| 0NUN3KZ | Supplement Left Zygomatic Bone with Nonautologous Tissue Substitute, Percutaneous Approach             |
| 0NUN47Z | Supplement Left Zygomatic Bone with Autologous Tissue Substitute, Percutaneous Endoscopic Approach     |
| 0NUN4JZ | Supplement Left Zygomatic Bone with Synthetic Substitute, Percutaneous Endoscopic Approach             |
| 0NUN4KZ | Supplement Left Zygomatic Bone with Nonautologous Tissue Substitute, Percutaneous Endoscopic Approach  |
| 0NUP07Z | Supplement Right Orbit with Autologous Tissue Substitute, Open Approach                                |
| 0NUP0KZ | Supplement Right Orbit with Nonautologous Tissue Substitute, Open Approach                             |
| 0NUP37Z | Supplement Right Orbit with Autologous Tissue Substitute, Percutaneous Approach                        |
| 0NUP3KZ | Supplement Right Orbit with Nonautologous Tissue Substitute, Percutaneous Approach                     |
| 0NUP47Z | Supplement Right Orbit with Autologous Tissue Substitute, Percutaneous Endoscopic Approach             |
| 0NUP4KZ | Supplement Right Orbit with Nonautologous Tissue Substitute, Percutaneous Endoscopic Approach          |
| 0NUQ07Z | Supplement Left Orbit with Autologous Tissue Substitute, Open Approach                                 |
| 0NUQ0KZ | Supplement Left Orbit with Nonautologous Tissue Substitute, Open Approach                              |
| 0NUQ37Z | Supplement Left Orbit with Autologous Tissue Substitute, Percutaneous Approach                         |
| 0NUQ3KZ | Supplement Left Orbit with Nonautologous Tissue Substitute, Percutaneous Approach                      |
| 0NUQ47Z | Supplement Left Orbit with Autologous Tissue Substitute, Percutaneous Endoscopic Approach              |
| 0NUQ4KZ | Supplement Left Orbit Endoscopic with Nonautologous Tissue Substitute, Percutaneous Approach           |
| 0NUR07Z | Supplement Right Maxilla with Autologous Tissue Substitute, Open Approach                              |
| 0NUR0JZ | Supplement Right Maxilla with Synthetic Substitute, Open Approach                                      |
| 0NUR0KZ | Supplement Right Maxilla with Nonautologous Tissue Substitute, Open Approach                           |
| 0NUR37Z | Supplement Right Maxilla with Autologous Tissue Substitute, Percutaneous Approach                      |
| 0NUR3JZ | Supplement Right Maxilla with Synthetic Substitute, Percutaneous Approach                              |
| 0NUR3KZ | Supplement Right Maxilla with Nonautologous Tissue Substitute, Percutaneous Approach                   |
| 0NUR47Z | Supplement Right Maxilla with Autologous Tissue Substitute, Percutaneous Endoscopic Approach           |
| 0NUR4JZ | Supplement Right Maxilla with Synthetic Substitute, Percutaneous Endoscopic Approach                   |
| 0NUR4KZ | Supplement Right Maxilla with Nonautologous Tissue Substitute, Percutaneous Endoscopic Approach        |
| 0NUX07Z | Supplement Hyoid Bone with Autologous Tissue Substitute, Open Approach                                 |
| 0NUX0JZ | Supplement Hyoid Bone with Synthetic Substitute, Open Approach                                         |
| 0NUX0KZ | Supplement Hyoid Bone with Nonautologous Tissue Substitute, Open Approach                              |
| 0NUX37Z | Supplement Hyoid Bone with Autologous Tissue Substitute, Percutaneous Approach                         |
| 0NUX3JZ | Supplement Hyoid Bone with Synthetic Substitute, Percutaneous Approach                                 |
| 0NUX3KZ | Supplement Hyoid Bone with Nonautologous Tissue Substitute, Percutaneous Approach                      |
| 0NUX47Z | Supplement Hyoid Bone with Autologous Tissue Substitute, Percutaneous Endoscopic Approach              |
| 0NUX4JZ | Supplement Hyoid Bone with Synthetic Substitute, Percutaneous Endoscopic Approach                      |
| 0NUX4KZ | Supplement Hyoid Bone with Nonautologous Tissue Substitute, Percutaneous Endoscopic Approach           |
| 0RNC0ZZ | Release Right Temporomandibular Joint, Open Approach                                                   |
| 0RNC3ZZ | Release Right Temporomandibular Joint, Percutaneous Approach                                           |
| 0RNC4ZZ | Release Right Temporomandibular Joint, Percutaneous Endoscopic Approach                                |
| 0RND0ZZ | Release Left Temporomandibular Joint, Open Approach                                                    |
| 0RND3ZZ | Release Left Temporomandibular Joint, Percutaneous Approach                                            |
| 0RND4ZZ | Release Left Temporomandibular Joint, Percutaneous Endoscopic Approach                                 |
| 0W0407Z | Alteration of Upper Jaw with Autologous Tissue Substitute, Open Approach                               |
| 0W040JZ | Alteration of Upper Jaw with Synthetic Substitute, Open Approach                                       |
| 0W040KZ | Alteration of Upper Jaw with Nonautologous Tissue Substitute, Open Approach                            |
| 0W040ZZ | Alteration of Upper Jaw, Open Approach                                                                 |
| 0W0437Z | Alteration of Upper Jaw with Autologous Tissue Substitute, Percutaneous Approach                       |
| 0W043JZ | Alteration of Upper Jaw with Synthetic Substitute, Percutaneous Approach                               |
| 0W043KZ | Alteration of Upper Jaw with Nonautologous Tissue Substitute, Percutaneous Approach                    |
| 0W043ZZ | Alteration of Upper Jaw, Percutaneous Approach                                                         |
| 0W0447Z | Alteration of Upper Jaw with Autologous Tissue Substitute, Percutaneous Endoscopic Approach            |

|                 |                                                                                                                                   |
|-----------------|-----------------------------------------------------------------------------------------------------------------------------------|
| 0W044JZ         | Alteration of Upper Jaw with Synthetic Substitute, Percutaneous Endoscopic Approach                                               |
| 0W044KZ         | Alteration of Upper Jaw with Nonautologous Tissue Substitute, Percutaneous Endoscopic Approach                                    |
| 0W044ZZ         | Alteration of Upper Jaw, Percutaneous Endoscopic Approach                                                                         |
| 0W0507Z         | Alteration of Lower Jaw with Autologous Tissue Substitute, Open Approach                                                          |
| 0W050JZ         | Alteration of Lower Jaw with Synthetic Substitute, Open Approach                                                                  |
| 0W050KZ         | Alteration of Lower Jaw with Nonautologous Tissue Substitute, Open Approach                                                       |
| 0W050ZZ         | Alteration of Lower Jaw, Open Approach                                                                                            |
| 0W0537Z         | Alteration of Lower Jaw with Autologous Tissue Substitute, Percutaneous Approach                                                  |
| 0W053JZ         | Alteration of Lower Jaw with Synthetic Substitute, Percutaneous Approach                                                          |
| 0W053KZ         | Alteration of Lower Jaw with Nonautologous Tissue Substitute, Percutaneous Approach                                               |
| 0W053ZZ         | Alteration of Lower Jaw, Percutaneous Approach                                                                                    |
| 0W0547Z         | Alteration of Lower Jaw with Autologous Tissue Substitute, Percutaneous Endoscopic Approach                                       |
| 0W054JZ         | Alteration of Lower Jaw with Synthetic Substitute, Percutaneous Endoscopic Approach                                               |
| 0W054KZ         | Alteration of Lower Jaw with Nonautologous Tissue Substitute, Percutaneous Endoscopic Approach                                    |
| 0W054ZZ         | Alteration of Lower Jaw, Percutaneous Endoscopic Approach                                                                         |
| 0W020ZZ         | Alteration of Face, Open Approach                                                                                                 |
| 0W0207Z         | Alteration of Face with Autologous Tissue Substitute, Open Approach                                                               |
| 0W020JZ         | Alteration of Face with Synthetic Substitute, Open Approach                                                                       |
| 0W020KZ         | Alteration of Face with Nonautologous Tissue Substitute, Open Approach                                                            |
| 0W023ZZ         | Alteration of Face, Percutaneous Approach                                                                                         |
| 0W0247Z         | Alteration of Face with Autologous Tissue Substitute, Percutaneous Endoscopic Approach                                            |
| 0W024JZ         | Alteration of Face with Synthetic Substitute, Percutaneous Endoscopic Approach                                                    |
| 0W024KZ         | Alteration of Face with Nonautologous Tissue Substitute, Percutaneous Endoscopic Approach                                         |
| 0W024ZZ         | Alteration of Face, Percutaneous Endoscopic Approach                                                                              |
| 0NS104Z         | Reposition Right Frontal Bone with Internal Fixation Device, Open Approach                                                        |
| 0NS10ZZ         | Reposition Frontal Bone, Open Approach                                                                                            |
| 0NS134Z         | Reposition Frontal Bone with Internal Fixation Device, Percutaneous Approach                                                      |
| 0NS13ZZ         | Reposition Frontal Bone, Percutaneous Approach                                                                                    |
| 0NS144Z         | Reposition Frontal Bone with Internal Fixation Device, Percutaneous Endoscopic Approach                                           |
| 0NS14ZZ         | Reposition Frontal Bone, Percutaneous Endoscopic Approach                                                                         |
| 0NS1XZZ         | Reposition Frontal Bone, External Approach                                                                                        |
| 0BB10ZZ         | Excision of Trachea, Open Approach                                                                                                |
| 0BB13ZZ         | Excision of Trachea, Percutaneous Approach                                                                                        |
| 0BF10ZZ         | Fragmentation in Trachea, Open Approach                                                                                           |
| 0BF13ZZ         | Fragmentation in Trachea, Percutaneous Approach                                                                                   |
| 0BF1XZZ         | Fragmentation in Trachea, External Approach                                                                                       |
| 0BN10ZZ         | Release Trachea, Open Approach                                                                                                    |
| 0BN13ZZ         | Release Trachea, Percutaneous Approach                                                                                            |
| 0BQ10ZZ         | Repair Trachea, Open Approach                                                                                                     |
| 0BQ13ZZ         | Repair Trachea, Percutaneous Approach                                                                                             |
| 0BS10ZZ         | Reposition Trachea, Open Approach                                                                                                 |
| 0BT10ZZ         | Resection of Trachea, Open Approach                                                                                               |
| 0BV10ZZ         | Restriction of Trachea, Open Approach                                                                                             |
| 0BV13ZZ         | Restriction of Trachea, Percutaneous Approach                                                                                     |
| 0BB14ZZ         | Excision of Trachea, Percutaneous Endoscopic Approach                                                                             |
| <b>CPT Face</b> |                                                                                                                                   |
| 21137           | Reduction forehead; contouring only                                                                                               |
| 21138           | Reduction forehead; contouring and application of prosthetic material or bone graft (includes obtaining autograft)                |
| 21139           | Reduction forehead; contouring and setback of anterior frontal sinus wall                                                         |
| 21208           | Osteoplasty, facial bones; augmentation (autograft, allograft, or prosthetic implant)                                             |
| 21209           | Osteoplasty, facial bones; reduction                                                                                              |
| 21299           | Unlisted craniofacial and maxillofacial procedure                                                                                 |
| 21499           | Unlisted musculoskeletal procedure, head                                                                                          |
| 67900           | Repair of brow ptosis (supraciliary, mid-forehead or coronal approach)                                                            |
| 15820           | Blepharoplasty, lower eyelid                                                                                                      |
| 15821           | Blepharoplasty, lower eyelid; with extensive herniated fat pad                                                                    |
| 15822           | Blepharoplasty, upper eyelid                                                                                                      |
| 15823           | Blepharoplasty, upper eyelid; with excessive skin weighting down lid                                                              |
| 30400           | Rhinoplasty, primary; lateral and alar cartilages and/or elevation of nasal tip                                                   |
| 30430           | RHINOPLASTY, SECONDARY; MINOR REVISION (SMALL AMOUNT OF NASAL TIP WORK)                                                           |
| 30410           | Rhinoplasty, primary; complete, external parts including bony pyramid, lateral and alar cartilages, and/or elevation of nasal tip |
| 30420           | Rhinoplasty, primary; including major septal repair                                                                               |
| 30435           | RHINOPLASTY, SECONDARY; INTERMEDIATE REVISION (BONY WORK WITH OSTEOTOMIES)                                                        |
| 30450           | RHINOPLASTY, SECONDARY; MAJOR REVISION (NASAL TIP WORK AND OSTEOTOMIES)                                                           |
| 21270           | Malar augmentation, prosthetic material                                                                                           |
| 21208           | Osteoplasty, facial bones; augmentation (autograft, allograft, or prosthetic implant)                                             |
| 21209           | Osteoplasty, facial bones; reduction                                                                                              |
| 21125           | Augmentation, mandibular body or angle; prosthetic material                                                                       |

|       |                                                                                                                                                                                                                                                        |
|-------|--------------------------------------------------------------------------------------------------------------------------------------------------------------------------------------------------------------------------------------------------------|
| 21127 | Augmentation, mandibular body or angle; with bone graft, onlay or interpositional (includes obtaining autograft)                                                                                                                                       |
| 21208 | Osteoplasty, facial bones; augmentation (autograft, allograft, or prosthetic implant)                                                                                                                                                                  |
| 21209 | Osteoplasty, facial bones; reduction                                                                                                                                                                                                                   |
| 21299 | Unlisted craniofacial and maxillofacial procedure                                                                                                                                                                                                      |
| 21499 | Unlisted musculoskeletal procedure, head                                                                                                                                                                                                               |
| 21120 | Genioplasty; augmentation (autograft, allograft, prosthetic material)                                                                                                                                                                                  |
| 21121 | Genioplasty; sliding osteotomy, single piece                                                                                                                                                                                                           |
| 21122 | Genioplasty; sliding osteotomies, 2 or more osteotomies (eg, wedge excision or bone wedge reversal for asymmetrical chin)                                                                                                                              |
| 21123 | Genioplasty; sliding, augmentation with interpositional bone grafts (includes obtaining autografts)                                                                                                                                                    |
| 21208 | Osteoplasty, facial bones; augmentation (autograft, allograft, or prosthetic implant)                                                                                                                                                                  |
| 21209 | Osteoplasty, facial bones; reduction                                                                                                                                                                                                                   |
| 21299 | Unlisted craniofacial and maxillofacial procedure                                                                                                                                                                                                      |
| 21499 | Unlisted musculoskeletal procedure, head                                                                                                                                                                                                               |
| 15824 | Rhytidectomy; forehead                                                                                                                                                                                                                                 |
| 15825 | Rhytidectomy; neck with platysmal tightening (platysmal flap, P-flap)                                                                                                                                                                                  |
| 15826 | Rhytidectomy; glabellar frown lines                                                                                                                                                                                                                    |
| 15828 | Rhytidectomy; cheek, chin, and neck                                                                                                                                                                                                                    |
| 15876 | Suction assisted lipectomy; head and neck                                                                                                                                                                                                              |
| 31599 | Unlisted procedure, larynx                                                                                                                                                                                                                             |
| 15829 | Rhytidectomy; superficial musculoaponeurotic system (smas) flap                                                                                                                                                                                        |
| 15838 | Excision, excessive skin and subcutaneous tissue (includes lipectomy); submental fat pad                                                                                                                                                               |
| 15769 | Grafting of autologous soft tissue, other, harvested by direct excision (eg, fat, dermis, fascia)                                                                                                                                                      |
| 15771 | Grafting of autologous fat harvested by liposuction technique to trunk, breasts, scalp, arms, and/or legs; 50 cc or less injectate                                                                                                                     |
| 15772 | Grafting of autologous fat harvested by liposuction technique to trunk, breasts, scalp, arms, and/or legs; each additional 50 cc injectate, or part thereof (list separately in addition to code for primary procedure)                                |
| 15773 | Grafting of autologous fat harvested by liposuction technique to face, eyelids, mouth, neck, ears, orbits, genitalia, hands, and/or feet; 25 cc or less injectate                                                                                      |
| 15774 | Grafting of autologous fat harvested by liposuction technique to face, eyelids, mouth, neck, ears, orbits, genitalia, hands, and/or feet; each additional 25 cc injectate, or part thereof (list separately in addition to code for primary procedure) |
| 15775 | Punch graft for hair transplant; 1 to 15 punch grafts                                                                                                                                                                                                  |
| 15776 | Punch graft for hair transplant; more than 15 punch grafts                                                                                                                                                                                             |
| 15838 | Excision, excessive skin and subcutaneous tissue (includes lipectomy); submental fat pad                                                                                                                                                               |

**eTable 3. Procedure Codes for Chest Surgery**

| ICD9 Chest Codes |                                                                                             |
|------------------|---------------------------------------------------------------------------------------------|
| 85.52            | bilateral breast aug                                                                        |
| 85.54            | bilateral breast implant                                                                    |
| 85.52            | Bilateral injection into breast for augmentation                                            |
| 85.50            | Augmentation mammoplasty, not otherwise specified                                           |
| 85.51            | Unilateral injection into breast for augmentation                                           |
| 85.52            | Bilateral injection into breast for augmentation                                            |
| 85.53            | Unilateral breast implant                                                                   |
| 85.54            | Bilateral breast implant                                                                    |
| 85.55            | Fat graft to breast                                                                         |
| 85.70            | Total reconstruction of breast, not otherwise specified                                     |
| 85.71            | Latissimus dorsi myocutaneous flap                                                          |
| 85.72            | Transverse rectus abdominis myocutaneous (TRAM) flap, pedicled                              |
| 85.73            | Transverse rectus abdominis myocutaneous (TRAM) flap, free                                  |
| 85.74            | Deep inferior epigastric artery perforator (DIEP) flap, free                                |
| 85.75            | Superficial inferior epigastric artery (SIEA) flap, free                                    |
| 85.76            | Gluteal artery perforator (GAP) flap, free                                                  |
| 85.79            | Other total reconstruction of breast                                                        |
| 85.89            | other mammoplasty                                                                           |
| 85.87            | Other repair or reconstruction of nipple                                                    |
| 85.44            | bilateral extended simple mastectomy                                                        |
| 85.46            | bilateral mastectomy; radical                                                               |
| 85.48            | bilateral extended extended mastectomy                                                      |
| 85.23            | Subtotal mastectomy                                                                         |
| 85.32            | Bilateral reduction mammoplasty                                                             |
| 85.36            | Other bilateral subcutaneous mamnectomy                                                     |
| ICD10 Chest      |                                                                                             |
| 0H0T0ZZ          | Alteration of Right Breast, Open Approach                                                   |
| 0H0T3ZZ          | Alteration of Right Breast, Percutaneous Approach                                           |
| 0H0U0ZZ          | Alteration of Left Breast, Open Approach                                                    |
| 0H0U3ZZ          | Alteration of Left Breast, Percutaneous Approach                                            |
| 0H0V07Z          | Alteration of Bilateral Breast with Autologous Tissue Substitute, Open Approach             |
| 0H0V0JZ          | Alteration of Bilateral Breast with Synthetic Substitute, Open Approach                     |
| 0H0V0KZ          | Alteration of Bilateral Breast with Nonautologous Tissue Substitute, Open Approach          |
| 0H0V0ZZ          | Alteration of Bilateral Breast, Open Approach                                               |
| 0H0V37Z          | Alteration of Bilateral Breast with Autologous Tissue Substitute, Percutaneous Approach     |
| 0H0V3JZ          | Alteration of Left Breast, Open Approach                                                    |
| 0H0V3KZ          | Alteration of Bilateral Breast with Nonautologous Tissue Substitute, Percutaneous Approach  |
| 0H0V3ZZ          | Alteration of Bilateral Breast, Percutaneous Approach                                       |
| 0H0W0ZZ          | Reattachment of Right Nipple, External Approach                                             |
| 0H0W3ZZ          | Reattachment of Left Nipple, External Approach                                              |
| 0H0T0JZ          | Alteration of Right Breast with Synthetic Substitute, Open Approach                         |
| 0H0T3JZ          | Alteration of Right Breast with Synthetic Substitute, Percutaneous Approach                 |
| 0H0U0JZ          | Alteration of Left Breast with Synthetic Substitute, Open Approach                          |
| 0H0U3JZ          | Alteration of Left Breast with Synthetic Substitute, Percutaneous Approach                  |
| 0H0V0JZ          | Alteration of Bilateral Breast with Synthetic Substitute, Open Approach                     |
| 0H0V3JZ          | Alteration of Bilateral Breast with Synthetic Substitute, Percutaneous Approach             |
| 0HRT07Z          | Replacement of Right Breast with Autologous Tissue Substitute, Open Approach                |
| 0HRT0KZ          | Replacement of Right Breast with Nonautologous Tissue Substitute, Open Approach             |
| 0HRT37Z          | Replacement of Right Breast with Autologous Tissue Substitute, Percutaneous Approach        |
| 0HRT3KZ          | Replacement of Right Breast with Nonautologous Tissue Substitute, Percutaneous Approach     |
| 0HRU07Z          | Replacement of Left Breast with Autologous Tissue Substitute, Open Approach                 |
| 0HRU0KZ          | Replacement of Left Breast with Nonautologous Tissue Substitute, Open Approach              |
| 0HRU37Z          | Replacement of Left Breast with Autologous Tissue Substitute, Percutaneous Approach         |
| 0HRU3KZ          | Replacement of Left Breast with Nonautologous Tissue Substitute, Percutaneous Approach      |
| 0HRV07Z          | Replacement of Bilateral Breast with Autologous Tissue Substitute, Open Approach            |
| 0HRV0KZ          | Replacement of Bilateral Breast with Nonautologous Tissue Substitute, Open Approach         |
| 0HRV37Z          | Replacement of Bilateral Breast with Autologous Tissue Substitute, Percutaneous Approach    |
| 0HRV3KZ          | Replacement of Bilateral Breast with Nonautologous Tissue Substitute, Percutaneous Approach |
| 0HRW07Z          | Replacement of Right Nipple with Autologous Tissue Substitute, Open Approach                |
| 0HRW0JZ          | Replacement of Right Nipple with Synthetic Substitute, Open Approach                        |
| 0HRW0KZ          | Replacement of Right Nipple with Nonautologous Tissue Substitute, Open Approach             |
| 0HRW37Z          | Replacement of Right Nipple with Autologous Tissue Substitute, Percutaneous Approach        |
| 0HRW3JZ          | Replacement of Right Nipple with Synthetic Substitute, Percutaneous Approach                |
| 0HRW3KZ          | Replacement of Right Nipple with Nonautologous Tissue Substitute, Percutaneous Approach     |
| 0HRWX7Z          | Replacement of Right Nipple with Autologous Tissue Substitute, External Approach            |
| 0HRWXJZ          | Replacement of Right Nipple with Synthetic Substitute, External Approach                    |
| 0HRWXKZ          | Replacement of Right Nipple with Nonautologous Tissue Substitute, External Approach         |
| 0HRX07Z          | Replacement of Left Nipple with Autologous Tissue Substitute, Open Approach                 |
| 0HRX0JZ          | Replacement of Left Nipple with Synthetic Substitute, Open Approach                         |
| 0HRX0KZ          | Replacement of Left Nipple with Nonautologous Tissue Substitute, Open Approach              |
| 0HRX37Z          | Replacement of Left Nipple with Autologous Tissue Substitute, Percutaneous Approach         |
| 0HRX3JZ          | Replacement of Left Nipple with Synthetic Substitute, Percutaneous Approach                 |

|         |                                                                                                                |
|---------|----------------------------------------------------------------------------------------------------------------|
| 0HRX3KZ | Replacement of Left Nipple with Nonautologous Tissue Substitute, Percutaneous Approach                         |
| 0HRXX7Z | Replacement of Left Nipple with Autologous Tissue Substitute, External Approach                                |
| 0HRXXJZ | Replacement of Left Nipple with Synthetic Substitute, External Approach                                        |
| 0HRXXKZ | Replacement of Left Nipple with Nonautologous Tissue Substitute, External Approach                             |
| 0HUT07Z | Supplement Right Breast with Autologous Tissue Substitute, Open Approach                                       |
| 0HUT0JZ | Supplement Right Breast with Synthetic Substitute, Open Approach                                               |
| 0HUT0KZ | Supplement Right Breast with Nonautologous Tissue Substitute, Open Approach                                    |
| 0HUT37Z | Supplement Right Breast with Autologous Tissue Substitute, Percutaneous Approach                               |
| 0HUT3JZ | Supplement Right Breast with Synthetic Substitute, Percutaneous Approach                                       |
| 0HUT3KZ | Supplement Right Breast with Nonautologous Tissue Substitute, Percutaneous Approach                            |
| 0HUT77Z | Supplement Right Breast with Autologous Tissue Substitute, Via Natural or Artificial Opening                   |
| 0HUT7JZ | Supplement Right Breast with Synthetic Substitute, Via Natural or Artificial Opening                           |
| 0HUT7KZ | Supplement Right Breast with Nonautologous Tissue Substitute, Via Natural or Artificial Opening                |
| 0HUT87Z | Supplement Right Breast with Autologous Tissue Substitute, Via Natural or Artificial Opening Endoscopic        |
| 0HUT8JZ | Supplement Right Breast with Synthetic Substitute, Via Natural or Artificial Opening Endoscopic                |
| 0HUT8KZ | Supplement Right Breast with Nonautologous Tissue Substitute, Via Natural or Artificial Opening Endoscopic     |
| 0HUU07Z | Supplement Left Breast with Autologous Tissue Substitute, Open Approach                                        |
| 0HUU0JZ | Supplement Left Breast with Synthetic Substitute, Open Approach                                                |
| 0HUU0KZ | Supplement Left Breast with Nonautologous Tissue Substitute, Open Approach                                     |
| 0HUU37Z | Supplement Left Breast with Autologous Tissue Substitute, Percutaneous Approach                                |
| 0HUU3JZ | Supplement Left Breast with Synthetic Substitute, Percutaneous Approach                                        |
| 0HUU3KZ | Supplement Left Breast with Nonautologous Tissue Substitute, Percutaneous Approach                             |
| 0HUU77Z | Supplement Left Breast with Autologous Tissue Substitute, Via Natural or Artificial Opening                    |
| 0HUU7JZ | Supplement Left Breast with Synthetic Substitute, Via Natural or Artificial Opening                            |
| 0HUU7KZ | Supplement Left Breast with Nonautologous Tissue Substitute, Via Natural or Artificial Opening                 |
| 0HUU87Z | Supplement Left Breast with Autologous Tissue Substitute, Via Natural or Artificial Opening Endoscopic         |
| 0HUU8JZ | Supplement Left Breast with Synthetic Substitute, Via Natural or Artificial Opening Endoscopic                 |
| 0HUU8KZ | Supplement Left Breast with Nonautologous Tissue Substitute, Via Natural or Artificial Opening Endoscopic      |
| 0HUV07Z | Supplement Bilateral Breast with Autologous Tissue Substitute, Open Approach                                   |
| 0HUV0JZ | Supplement Bilateral Breast with Synthetic Substitute, Open Approach                                           |
| 0HUV0KZ | Supplement Bilateral Breast with Nonautologous Tissue Substitute, Open Approach                                |
| 0HUV37Z | Supplement Bilateral Breast with Autologous Tissue Substitute, Percutaneous Approach                           |
| 0HUV3JZ | Supplement Bilateral Breast with Synthetic Substitute, Percutaneous Approach                                   |
| 0HUV3KZ | Supplement Bilateral Breast with Nonautologous Tissue Substitute, Percutaneous Approach                        |
| 0HUV77Z | Supplement Bilateral Breast with Autologous Tissue Substitute, Via Natural or Artificial Opening               |
| 0HUV7JZ | Supplement Bilateral Breast with Synthetic Substitute, Via Natural or Artificial Opening                       |
| 0HUV7KZ | Supplement Bilateral Breast with Nonautologous Tissue Substitute, Via Natural or Artificial Opening            |
| 0HUV87Z | Supplement Bilateral Breast With Autologous Tissue Substitute, Via Natural or Artificial Opening Endoscopic    |
| 0HUV8JZ | Supplement Bilateral Breast with Synthetic Substitute, Via Natural or Artificial Opening Endoscopic            |
| 0HUV8KZ | Supplement Bilateral Breast With Nonautologous Tissue Substitute, Via Natural or Artificial Opening Endoscopic |
| 0HUW07Z | Supplement Right Nipple with Autologous Tissue Substitute, Open Approach                                       |
| 0HUW0JZ | Supplement Right Nipple with Synthetic Substitute, Open Approach                                               |
| 0HUW0KZ | Supplement Right Nipple with Nonautologous Tissue Substitute, Open Approach                                    |
| 0HUW37Z | Supplement Right Nipple with Autologous Tissue Substitute, Percutaneous Approach                               |
| 0HUW3JZ | Supplement Right Nipple with Synthetic Substitute, Percutaneous Approach                                       |
| 0HUW3KZ | Supplement Right Nipple with Nonautologous Tissue Substitute, Percutaneous Approach                            |
| 0HUW77Z | Supplement Right Nipple with Autologous Tissue Substitute, Via Natural or Artificial Opening                   |
| 0HUW7JZ | Supplement Right Nipple with Synthetic Substitute, Via Natural or Artificial Opening                           |
| 0HUW7KZ | Supplement Right Nipple with Nonautologous Tissue Substitute, Via Natural or Artificial Opening                |
| 0HUW87Z | Supplement Right Nipple with Autologous Tissue Substitute, Via Natural or Artificial Opening Endoscopic        |
| 0HUW8JZ | Supplement Right Nipple with Synthetic Substitute, Via Natural or Artificial Opening Endoscopic                |
| 0HUW8KZ | Supplement Right Nipple with Nonautologous Tissue Substitute, Via Natural or Artificial Opening Endoscopic     |
| 0HUWX7Z | Supplement Right Nipple with Autologous Tissue Substitute, External Approach                                   |
| 0HUWXJZ | Supplement Right Nipple with Synthetic Substitute, External Approach                                           |
| 0HUWXKZ | Supplement Right Nipple with Nonautologous Tissue Substitute, External Approach                                |
| 0HUX07Z | Supplement Left Nipple with Autologous Tissue Substitute, Open Approach                                        |
| 0HUX0JZ | Supplement Left Nipple with Synthetic Substitute, Open Approach                                                |
| 0HUX0KZ | Supplement Left Nipple with Nonautologous Tissue Substitute, Open Approach                                     |
| 0HUX37Z | Supplement Left Nipple with Autologous Tissue Substitute, Percutaneous Approach                                |
| 0HUX3JZ | Supplement Left Nipple with Synthetic Substitute, Percutaneous Approach                                        |
| 0HUX3KZ | Supplement Left Nipple with Nonautologous Tissue Substitute, Percutaneous Approach                             |
| 0HUX77Z | Supplement Left Nipple with Autologous Tissue Substitute, Via Natural or Artificial Opening                    |
| 0HUX7JZ | Supplement Left Nipple with Synthetic Substitute, Via Natural or Artificial Opening                            |
| 0HUX7KZ | Supplement Left Nipple with Nonautologous Tissue Substitute, Via Natural or Artificial Opening                 |
| 0HUX87Z | Supplement Left Nipple with Autologous Tissue Substitute, Via Natural or Artificial Opening Endoscopic         |
| 0HUX8JZ | Supplement Left Nipple with Synthetic Substitute, Via Natural or Artificial Opening Endoscopic                 |
| 0HUX8KZ | Supplement Left Nipple with Nonautologous Tissue Substitute, Via Natural or Artificial Opening Endoscopic      |
| 0HUXX7Z | Supplement Left Nipple with Autologous Tissue Substitute, External Approach                                    |
| 0HUXXJZ | Supplement Left Nipple with Synthetic Substitute, External Approach                                            |
| 0HUXXKZ | Supplement Left Nipple with Nonautologous Tissue Substitute, External Approach                                 |
| 0HOT0ZZ | Alteration of Right Breast, Open Approach                                                                      |
| 0HOT3ZZ | Alteration of Right Breast, Percutaneous Approach                                                              |
| 0HOU0ZZ | Alteration of Left Breast, Open Approach                                                                       |
| 0HOU3ZZ | Alteration of Left Breast, Percutaneous Approach                                                               |
| 0HOV07Z | Alteration of Bilateral Breast with Autologous Tissue Substitute, Open Approach                                |

|          |                                                                                            |
|----------|--------------------------------------------------------------------------------------------|
| 0H0V0JZ  | Alteration of Bilateral Breast with Synthetic Substitute, Open Approach                    |
| 0H0V0KZ  | Alteration of Bilateral Breast with Nonautologous Tissue Substitute, Open Approach         |
| 0H0V0ZZ  | Alteration of Bilateral Breast, Open Approach                                              |
| 0H0V37Z  | Alteration of Bilateral Breast with Autologous Tissue Substitute, Percutaneous Approach    |
| 0H0V3JZ  | Alteration of Bilateral Breast with Synthetic Substitute, Percutaneous Approach            |
| 0H0V3KZ  | Alteration of Bilateral Breast with Nonautologous Tissue Substitute, Percutaneous Approach |
| 0H0V3ZZ  | Alteration of Bilateral Breast, Percutaneous Approach                                      |
| 0HNT0ZZ  | Release Right Breast, Open Approach                                                        |
| 0HNT3ZZ  | Release Right Breast, Percutaneous Approach                                                |
| 0HNT7ZZ  | Release Right Breast, Via Natural or Artificial Opening                                    |
| 0HNT8ZZ  | Release Right Breast, Via Natural or Artificial Opening Endoscopic                         |
| 0HNTXZZ  | Release Right Breast, External Approach                                                    |
| 0HNU0ZZ  | Release Left Breast, Open Approach                                                         |
| 0HNU3ZZ  | Release Left Breast, Percutaneous Approach                                                 |
| 0HNU7ZZ  | Release Left Breast, Via Natural or Artificial Opening                                     |
| 0HNU8ZZ  | Release Left Breast, Via Natural or Artificial Opening Endoscopic                          |
| 0HNV0ZZ  | Release Bilateral Breast, Open Approach                                                    |
| 0HNV3ZZ  | Release Bilateral Breast, Percutaneous Approach                                            |
| 0HNV7ZZ  | Release Bilateral Breast, Via Natural or Artificial Opening                                |
| 0HNV8ZZ  | Release Bilateral Breast, Via Natural or Artificial Opening Endoscopic Approach            |
| 0HNVXZZ  | Release Bilateral Breast, External                                                         |
| 0HNVW0ZZ | Release Right Nipple, Open Approach                                                        |
| 0HNVW3ZZ | Release Right Nipple, Percutaneous Approach                                                |
| 0HNVW7ZZ | Release Right Nipple, Via Natural or Artificial Opening                                    |
| 0HNVW8ZZ | Release Right Nipple, Via Natural or Artificial Opening Endoscopic                         |
| 0HNVWXZZ | Release Right Nipple, External Approach                                                    |
| 0HNX0ZZ  | Release Left Nipple, Open Approach                                                         |
| 0HNX3ZZ  | Release Left Nipple, Percutaneous Approach                                                 |
| 0HNX7ZZ  | Release Left Nipple, Via Natural or Artificial Opening                                     |
| 0HNX8ZZ  | Release Left Nipple, Via Natural or Artificial Opening Endoscopic                          |
| 0HNXXZZ  | Release Left Nipple, External Approach                                                     |
| 0HQT0ZZ  | Repair Right Breast, Open Approach                                                         |
| 0HQT3ZZ  | Repair Right Breast, Percutaneous Approach                                                 |
| 0HQT7ZZ  | Repair Right Breast, Via Natural or Artificial Opening                                     |
| 0HQT8ZZ  | Repair Right Breast, Via Natural or Artificial Opening Endoscopic                          |
| 0HQV0ZZ  | Repair Left Breast, Open Approach                                                          |
| 0HQV3ZZ  | Repair Left Breast, Percutaneous Approach                                                  |
| 0HQV7ZZ  | Repair Left Breast, Via Natural or Artificial Opening                                      |
| 0HQV8ZZ  | Repair Left Breast, Via Natural or Artificial Opening Endoscopic                           |
| 0HQVW0ZZ | Repair Right Breast, Open Approach                                                         |
| 0HQVW3ZZ | Repair Right Breast, Percutaneous Approach                                                 |
| 0HQVW7ZZ | Repair Right Breast, Via Natural or Artificial Opening                                     |
| 0HQVW8ZZ | Repair Right Breast, Via Natural or Artificial Opening Endoscopic                          |
| 0HQVWXZZ | Repair Right Breast, External Approach                                                     |
| 0HQX0ZZ  | Repair Left Nipple, Open Approach                                                          |
| 0HQX3ZZ  | Repair Left Nipple, Percutaneous Approach                                                  |
| 0HQX7ZZ  | Repair Left Nipple, Via Natural or Artificial Opening                                      |
| 0HQX8ZZ  | Repair Left Nipple, Via Natural or Artificial Opening Endoscopic                           |
| 0HQXXZZ  | Repair Left Nipple, External Approach                                                      |
| 0HQXXZZ  | Repair Supernumerary Breast, Open Approach                                                 |

|         |                                                                             |
|---------|-----------------------------------------------------------------------------|
| 0HQY0ZZ |                                                                             |
| 0HQY3ZZ | Repair Supernumerary Breast, Percutaneous Approach                          |
| 0HQY7ZZ | Repair Supernumerary Breast, Via Natural or Artificial Opening              |
| 0HQY8ZZ | Repair Supernumerary Breast, Via Natural or Artificial Opening Endoscopic   |
| 0HBV0ZZ | Excision of Bilateral Breast, Open Approach                                 |
| 0HBV3ZZ | Excision of Bilateral Breast, Percutaneous Approach                         |
| 0HBV7ZX | Excision of Bilateral Breast, Via Natural or Artificial Opening, Diagnostic |
| 0HBV7ZZ | Excision of Bilateral Breast, Via Natural or Artificial Opening             |
| 0HBV8ZZ | Excision of Bilateral Breast, Via Natural or Artificial Opening Endoscopic  |
| 0HBT0ZZ | Excision of Right Breast, Open Approach                                     |
| 0HBT3ZZ | Excision of Right Breast, Percutaneous Approach                             |
| 0HBT7ZZ | Excision of Right Breast, Via Natural or Artificial Opening                 |
| 0HBT8ZZ | Excision of Right Breast, Via Natural or Artificial Opening Endoscopic      |
| 0HBU0ZZ | Excision of Left Breast, Open Approach                                      |
| 0HBU3ZZ | Excision of Left Breast, Percutaneous Approach                              |
| 0HBU7ZZ | Excision of Left Breast, Via Natural or Artificial Opening                  |
| 0HBU8ZZ | Excision of Left Breast, Via Natural or Artificial Opening Endoscopic       |

**eTable 4. Procedure Codes for Genital Surgery**

| <b>ICD9 Genital</b> |                                                                   |
|---------------------|-------------------------------------------------------------------|
| 62.3                | Unilateral orchiectomy                                            |
| 62.4                | Bilateral orchiectomy                                             |
| 62.41               | Removal of both testes at same operative episode                  |
| 62.42               | Removal of remaining testis                                       |
| 60.3                | Suprapubic prostatectomy                                          |
| 60.4                | Retropubic prostatectomy                                          |
| 60.5                | Radical prostatectomy                                             |
| 60.6                | Other prostatectomy                                               |
| 60.61               | Local excision of lesion of prostate                              |
| 60.62               | Perineal prostatectomy                                            |
| 60.69               | Other prostatectomy                                               |
| 58.1                | Urethral meatotomy                                                |
| 58.4                | Repair of urethra                                                 |
| 58.41               | Suture of laceration of urethra                                   |
| 58.42               | Closure of urethrostomy                                           |
| 58.43               | Closure of other fistula of urethra                               |
| 58.44               | Reanastomosis of urethra                                          |
| 58.46               | Other reconstruction of urethra                                   |
| 58.47               | Urethral meatoplasty                                              |
| 58.49               | Other repair of urethra                                           |
| 58.5                | Release of urethral stricture                                     |
| 58.6                | Dilation of urethra                                               |
| 58.9                | Other operations on urethra and periurethral tissue               |
| 58.91               | Incision of periurethral tissue                                   |
| 58.92               | Excision of periurethral tissue                                   |
| 58.99               | Other operations on urethra and periurethral tissue               |
| 70.6                | Vaginal construction and reconstruction                           |
| 70.61               | Vaginal construction                                              |
| 70.62               | Vaginal reconstruction                                            |
| 70.63               | Vaginal construction with graft or prosthesis                     |
| 70.64               | Vaginal reconstruction with graft or prosthesis                   |
| 70.7                | Other repair of vagina                                            |
| 70.71               | Suture of laceration of vagina                                    |
| 70.72               | Repair of colovaginal fistula                                     |
| 70.73               | Repair of rectovaginal fistula                                    |
| 70.74               | Repair of other vaginoenteric fistula                             |
| 70.75               | Repair of other fistula of vagina                                 |
| 70.76               | Hymenorrhaphy                                                     |
| 70.77               | Vaginal suspension and fixation                                   |
| 70.78               | Vaginal suspension and fixation with graft or prosthesis          |
| 70.79               | Other repair of vagina                                            |
| 64.3                | Amputation of penis                                               |
| 71.4                | Operations on clitoris                                            |
| 62.7                | Insertion of testicular prosthesis                                |
| 70.4                | Obliteration and total excision of vagina                         |
| 71.3                | Other local excision or destruction of vulva and perineum         |
| 71.4                | Operations on clitoris                                            |
| 71.5                | Radical vulvectomy                                                |
| 71.6                | Other vulvectomy                                                  |
| 71.61               | Unilateral vulvectomy                                             |
| 71.62               | Bilateral vulvectomy                                              |
| 71.7                | Repair of vulva and perineum                                      |
| 71.71               | Suture of laceration of vulva or perineum                         |
| 71.72               | Repair of fistula of vulva or perineum                            |
| 71.79               | Other repair of vulva and perineum                                |
| 71.8                | Other operations on vulva                                         |
| 71.9                | Other operations on female genital organs                         |
| 62.7                | Testicular prosthesis                                             |
| 64.43               | Construction of penis                                             |
| 64.44               | Reconstruction of penis                                           |
| 64.94               | Fitting of external prosthesis of penis                           |
| 64.95               | Insertion or replacement of non-inflatable penile prosthesis      |
| 64.96               | Removal of internal prosthesis of penis                           |
| 64.97               | Insertion or replacement of inflatable penile prosthesis          |
| 64.98               | Other operations on penis                                         |
| 65.61               | Other removal of both ovaries and tubes at same operative episode |



|                      |                                                                                          |
|----------------------|------------------------------------------------------------------------------------------|
| 65.63                | Laparoscopic removal of both ovaries and tubes at same operative episode                 |
| 68.31                | Laparoscopic supracervical hysterectomy [LSH]                                            |
| 68.39                | Other and unspecified subtotal abdominal hysterectomy                                    |
| 68.41                | Laparoscopic total abdominal hysterectomy                                                |
| 68.49                | Other and unspecified total abdominal hysterectomy                                       |
| 66.5                 | Total bilateral salpingectomy                                                            |
| 66.51                | Removal of both fallopian tubes at same operative episode                                |
| 66.52                | Removal of remaining fallopian tube                                                      |
| 66.6                 | Other salpingectomy                                                                      |
| 66.61                | Excision or destruction of lesion of fallopian tube                                      |
| 66.62                | Salpingectomy with removal of tubal pregnancy                                            |
| 66.63                | Bilateral partial salpingectomy, not otherwise specified                                 |
| 66.69                | Other partial salpingectomy                                                              |
| 68.3                 | Subtotal abdominal hysterectomy                                                          |
| 68.31                | Laparoscopic supracervical hysterectomy [LSH]                                            |
| 68.39                | Other and unspecified subtotal abdominal hysterectomy                                    |
| 68.4                 | Total abdominal hysterectomy                                                             |
| 68.41                | Laparoscopic total abdominal hysterectomy                                                |
| 68.49                | Other and unspecified total abdominal hysterectomy                                       |
| 68.5                 | Vaginal hysterectomy                                                                     |
| 68.51                | Laparoscopically assisted vaginal hysterectomy (LAVH)                                    |
| 68.59                | Other and unspecified vaginal hysterectomy                                               |
| 68.6                 | Radical abdominal hysterectomy                                                           |
| 68.61                | Laparoscopic radical abdominal hysterectomy                                              |
| 68.69                | Other and unspecified radical abdominal hysterectomy                                     |
| 68.7                 | Radical vaginal hysterectomy                                                             |
| 68.71                | Laparoscopic radical vaginal hysterectomy [LRVH]                                         |
| 68.79                | Other and unspecified radical vaginal hysterectomy                                       |
| 68.8                 | Pelvic evisceration                                                                      |
| 68.9                 | Other and unspecified hysterectomy                                                       |
| 58.1                 | Urethral meatotomy                                                                       |
| 58.4                 | Repair of urethra                                                                        |
| 58.41                | Suture of laceration of urethra                                                          |
| 58.42                | Closure of urethrostomy                                                                  |
| 58.43                | Closure of other fistula of urethra                                                      |
| 58.44                | Reanastomosis of urethra                                                                 |
| 58.46                | Other reconstruction of urethra                                                          |
| 58.47                | Urethral meatoplasty                                                                     |
| 58.49                | Other repair of urethra                                                                  |
| 58.5                 | Release of urethral stricture                                                            |
| 58.6                 | Dilation of urethra                                                                      |
| 58.9                 | Other Operations On Urethra And Periurethral Tissue                                      |
| 58.91                | Incision of periurethral tissue                                                          |
| 58.92                | Excision of periurethral tissue                                                          |
| 58.99                | Other operations on urethra and periurethral tissue                                      |
| <b>ICD10 Genital</b> |                                                                                          |
| 0UMJXZZ              | Reattachment of Clitoris, External Approach                                              |
| 0UMJXZZ              | Reattachment of Clitoris, External Approach                                              |
| 0UNJ0ZZ              | Release clitoris, open approach                                                          |
| 0UNJXZZ              | Release clitoris, external approach                                                      |
| 0UQG0ZZ              | Repair vagina, open approach                                                             |
| 0UQJ0ZZ              | Repair clitoris, open approach                                                           |
| 0UQJXZZ              | Repair clitoris, external approach                                                       |
| 0UTJ0ZZ              | Resection of Clitoris, Open Approach                                                     |
| 0UTJXZZ              | Resection of Clitoris, External Approach                                                 |
| 0UUG07Z              | Supplement Vagina with Autologous Tissue Substitute, Open Approach                       |
| 0UUG0JZ              | Supplement Vagina with Synthetic Substitute, Open Approach                               |
| 0UUG0KZ              | Supplement Vagina with Nonautologous Tissue Substitute, Open Approach                    |
| 0UUG47Z              | Supplement Vagina with Autologous Tissue Substitute, Percutaneous Endoscopic Approach    |
| 0UUG4JZ              | Supplement Vagina with Synthetic Substitute, Percutaneous Endoscopic Approach            |
| 0UUG4KZ              | Supplement Vagina with Nonautologous Tissue Substitute, Percutaneous Endoscopic Approach |

|         |                                                                                           |
|---------|-------------------------------------------------------------------------------------------|
| 0UUG77Z | Supplement Vagina with Autologous Tissue Substitute, Via Natural or Artificial Opening    |
| 0UUG7JZ | Supplement Vagina with Synthetic Substitute, Via Natural or Artificial Opening            |
| 0UUG7KZ | Supplement Vagina with Nonautologous Tissue Substitute, Via Natural or Artificial Opening |
| 0UUGX7Z | Supplement Vagina with Autologous Tissue Substitute, External Approach                    |
| 0UUGXJZ | Supplement Vagina with Synthetic Substitute, External Approach                            |
| 0UUGXKZ | Supplement Vagina with Nonautologous Tissue Substitute, External Approach                 |
| 0UUJ07Z | Supplement Clitoris with Autologous Tissue Substitute, Open Approach                      |
| 0UUJ0JZ | Supplement Clitoris with Synthetic Substitute, Open Approach                              |
| 0UUJ0KZ | Supplement Clitoris with Nonautologous Tissue Substitute, Open Approach                   |
| 0UUJX7Z | Supplement Clitoris with Autologous Tissue Substitute, External Approach                  |
| 0UUJXJZ | Supplement Clitoris with Synthetic Substitute, External Approach                          |
| 0UUJXKZ | Supplement Clitoris with Nonautologous Tissue Substitute, External Approach               |
| 0VTS0ZZ | Resection of Penis, Open Approach                                                         |
| 0VTS4ZZ | Resection of Penis, Percutaneous Endoscopic Approach                                      |
| 0VTSXZZ | Resection of Penis, External Approach                                                     |
| 0W4M070 | Creation of Vagina in Male Perineum with Autologous Tissue Substitute, Open Approach      |
| 0W4M0J0 | Creation of Vagina in Male Perineum with Synthetic Substitute, Open Approach              |
| 0W4M0K0 | Creation of Vagina in Male Perineum with Nonautologous Tissue Substitute, Open Approach   |
| 0VTC0ZZ | Resection of Bilateral Testes, Open Approach                                              |
| 0VT90ZZ | Resection of Right Testis, Open Approach                                                  |
| 0VT94ZZ | Resection of Right Testis, Percutaneous Endoscopic Approach                               |
| 0VTB0ZZ | Resection of Left Testis, Open Approach                                                   |
| 0VTB4ZZ | Resection of Left Testis, Percutaneous Endoscopic Approach                                |
| 0VTC4ZZ | Resection of Bilateral Testes, Percutaneous Endoscopic Approach                           |
| 0U5J0ZZ | Destruction of Clitoris, Open Approach                                                    |
| 0U5JXZZ | Destruction of Clitoris, External Approach                                                |
| 0U9J00Z | Drainage of Clitoris with Drainage Device, Open Approach                                  |
| 0U9J0ZZ | Drainage of Clitoris, Open Approach                                                       |
| 0U9JX0Z | Drainage of Clitoris with Drainage Device, External Approach                              |
| 0U9JXZZ | Drainage of Clitoris, External Approach                                                   |
| 0UBJ0ZX | Excision of Clitoris, Open Approach, Diagnostic                                           |
| 0UBJ0ZZ | Excision of Clitoris, Open Approach                                                       |
| 0UBJXZX | Excision of Clitoris, External Approach, Diagnostic                                       |
| 0UBJXZZ | Excision of Clitoris, External Approach                                                   |
| 0UCJ0ZZ | Extirpation of Matter from Clitoris, Open Approach                                        |
| 0UCJXZZ | Extirpation of Matter from Clitoris, External Approach                                    |
| 0UMJXZZ | Reattachment of Clitoris, External Approach                                               |
| 0UNJ0ZZ | Release clitoris, open approach                                                           |
| 0UNJXZZ | Release clitoris, external approach                                                       |
| 0UQG0ZZ | Repair vagina, open approach                                                              |
| 0UQJ0ZZ | Repair clitoris, open approach                                                            |
| 0UQJXZZ | Repair clitoris, external approach                                                        |
| 0UTJ0ZZ | Resection of Clitoris, Open Approach                                                      |
| 0UTJXZZ | Resection of Clitoris, External Approach                                                  |

|         |                                                                                                     |
|---------|-----------------------------------------------------------------------------------------------------|
| 0W4N071 | Creation of Penis in Female Perineum with Autologous Tissue Substitute, Open Approach               |
| 0W4N0J1 | Creation of Penis in Female Perineum with Synthetic Substitute, Open Approach                       |
| 0W4N0Z1 | Creation of Penis in Female Perineum, Open Approach                                                 |
| 0W4N0K1 | Creation of Penis in Female Perineum with Nonautologous Tissue Substitute, Open Approach            |
| 0UTG0ZZ | Resection of Vagina, Open Approach                                                                  |
| 0UTG4ZZ | Resection of Vagina, Percutaneous Endoscopic Approach                                               |
| 0UTG7ZZ | Resection of Vagina, Via Natural or Artificial Opening                                              |
| 0UTG8ZZ | Resection of Vagina, Via Natural or Artificial Opening Endoscopic                                   |
| 0UTM0ZZ | Resection of Vulva, Open Approach                                                                   |
| 0UTMXZZ | Resection of Vulva, External Approach                                                               |
| 0UT90ZZ | Resection of uterus, open approach                                                                  |
| 0UT94ZL | Resection of uterus, percutaneous endoscopic, supracervical                                         |
| 0UT70ZZ | Bilateral fallopian tubes                                                                           |
| 0UT20ZZ | Bilateral ovaries                                                                                   |
| 0UTC0ZZ | Resection of cervix, open approach                                                                  |
| 0UBC0ZZ | Removal cervix partial                                                                              |
| 0UJD4ZZ | Inspection of uterus and cervix, percutaneous endoscopic approach                                   |
| 8E0W4CZ | Robotic assisted procedure of trunk region, percutaneous endoscopic approach                        |
| 0UT00ZZ | Resection of Right Ovary, Open Approach                                                             |
| 0UT10ZZ | Resection of Left Ovary, Open Approach                                                              |
| 0UT24ZZ | Resection of Bilateral Ovaries, Percutaneous Endoscopic Approach                                    |
| 0UT20ZZ | Resection of Bilateral Ovaries, Open Approach                                                       |
| 0UT04ZZ | Resection of Right Ovary, Percutaneous Endoscopic Approach                                          |
| 0UT14ZZ | Resection of Left Ovary, Percutaneous Endoscopic Approach                                           |
| 0UT07ZZ | Resection of Right Ovary, Via Natural or Artificial Opening                                         |
| 0UT17ZZ | Resection of Left Ovary, Via Natural or Artificial Opening                                          |
| 0UT08ZZ | Resection of Right Ovary, Via Natural or Artificial Opening Endoscopic                              |
| 0UT0FZZ | Resection of Right Ovary, Via Natural or Artificial Opening With Percutaneous Endoscopic Assistance |
| 0UT18ZZ | Resection of Left Ovary, Via Natural or Artificial Opening Endoscopic                               |
| 0UT1FZZ | Resection of Left Ovary, Via Natural or Artificial Opening With Percutaneous Endoscopic Assistance  |
| 0UB50ZX | Excision of Right Fallopian Tube, Open Approach, Diagnostic                                         |
| 0UB50ZZ | Excision of Right Fallopian Tube, Open Approach                                                     |
| 0UB53ZX | Excision of Right Fallopian Tube, Percutaneous Approach, Diagnostic                                 |
| 0UB53ZZ | Excision of Right Fallopian Tube, Percutaneous Approach                                             |
| 0UB54ZZ | Excision of Right Fallopian Tube, Percutaneous Endoscopic Approach                                  |
| 0UB60ZX | Excision of Left Fallopian Tube, Open Approach, Diagnostic                                          |
| 0UB60ZZ | Excision of Left Fallopian Tube, Open Approach                                                      |
| 0UB63ZX | Excision of Left Fallopian Tube, Percutaneous Approach, Diagnostic                                  |
| 0UB63ZZ | Excision of Left Fallopian Tube, Percutaneous Approach                                              |
| 0UB64ZZ | Excision of Left Fallopian Tube, Percutaneous Endoscopic Approach                                   |
| 0UB70ZX | Excision of Bilateral Fallopian Tubes, Open Approach, Diagnostic                                    |
| 0UB70ZZ | Excision of Bilateral Fallopian Tubes, Open Approach                                                |
| 0UB73ZX | Excision of Bilateral Fallopian Tubes, Percutaneous Approach, Diagnostic                            |
| 0UB73ZZ | Excision of Bilateral Fallopian Tubes, Percutaneous Approach                                        |
| 0UB74ZZ | Excision of Bilateral Fallopian Tubes, Percutaneous Endoscopic Approach                             |
| 0UB54ZX | Excision of Right Fallopian Tube, Percutaneous Endoscopic Approach, Diagnostic                      |

|                    |                                                                                                                               |
|--------------------|-------------------------------------------------------------------------------------------------------------------------------|
| 0UB57ZX            | Excision of Right Fallopian Tube, Via Natural or Artificial Opening, Diagnostic                                               |
| 0UB57ZZ            | Excision of Right Fallopian Tube, Via Natural or Artificial Opening                                                           |
| 0UB58ZX            | Excision of Right Fallopian Tube, Via Natural or Artificial Opening Endoscopic, Diagnostic                                    |
| 0UB58ZZ            | Excision of Right Fallopian Tube, Via Natural or Artificial Opening Endoscopic                                                |
| 0UB64ZX            | Excision of Left Fallopian Tube, Percutaneous Endoscopic Approach, Diagnostic                                                 |
| 0UB67ZX            | Excision of Left Fallopian Tube, Via Natural or Artificial Opening, Diagnostic                                                |
| 0UB67ZZ            | Excision of Left Fallopian Tube, Via Natural or Artificial Opening                                                            |
| 0UB68ZX            | Excision of Left Fallopian Tube, Via Natural or Artificial Opening Endoscopic, Diagnostic                                     |
| 0UB68ZZ            | Excision of Left Fallopian Tube, Via Natural or Artificial Opening Endoscopic                                                 |
| 0UB74ZX            | Excision of Bilateral Fallopian Tubes, Percutaneous Endoscopic Approach, Diagnostic                                           |
| 0UB77ZX            | Excision of Bilateral Fallopian Tubes, Via Natural or Artificial Opening, Diagnostic                                          |
| 0UB77ZZ            | Excision of Bilateral Fallopian Tubes, Via Natural or Artificial Opening                                                      |
| 0UB78ZX            | Excision of Bilateral Fallopian Tubes, Via Natural or Artificial Opening Endoscopic, Diagnostic                               |
| 0UB78ZZ            | Excision of Bilateral Fallopian Tubes, Via Natural or Artificial Opening Endoscopic                                           |
| <b>CPT Genital</b> |                                                                                                                               |
| 53410              | Urethroplasty, 1-stage reconstruction of male anterior urethra                                                                |
| 53420              | Urethroplasty, 2-stage reconstruction or repair of prostatic or membranous urethra; first stage                               |
| 53425              | Urethroplasty, 2-stage reconstruction or repair of prostatic or membranous urethra; second stage                              |
| 54120              | Amputation of penis; partial                                                                                                  |
| 54125              | Amputation of penis; complete                                                                                                 |
| 54300              | Plastic operation of penis for straightening of chordee (eg, hypospadias), with or without mobilization of urethra            |
| 55970              | Intersex surgery; male to female                                                                                              |
| 56800              | Plastic repair of introitus                                                                                                   |
| 56805              | Clitoroplasty for intersex state                                                                                              |
| 57291              | Construction of artificial vagina; without graft                                                                              |
| 57292              | Construction of artificial vagina; with graft                                                                                 |
| 57335              | Vaginoplasty for intersex state                                                                                               |
| 57295              | Revision (including removal) of prosthetic vaginal graft; vaginal approach                                                    |
| 57296              | Revision (including removal) of prosthetic vaginal graft; open abdominal approach                                             |
| 57426              | Revision (including removal) of prosthetic vaginal graft, laparoscopic approach                                               |
| 54520              | Orchiectomy, simple (including subcapsular), with or without testicular prosthesis, scrotal or inguinal approach              |
| 54690              | Laparoscopy, surgical; orchiectomy                                                                                            |
| 55866              | Laparoscopy, surgical prostatectomy, retropubic radical, including nerve sparing, includes robotic assistance, when performed |
| 55970              | Intersex surgery; male to female                                                                                              |
| 53430              | Urethroplasty, reconstruction of female urethra                                                                               |
| 54660              | Insertion testicular prosthesis                                                                                               |
| 55175              | Scrotoplasty; simple                                                                                                          |
| 55180              | Scrotoplasty; complex                                                                                                         |
| 55980              | Intersex surgery; female to male                                                                                              |
| 56620              | Vulvectomy; simple                                                                                                            |
| 56625              | Vulvectomy; complete                                                                                                          |
| 56800              | Plastic repair of introitus                                                                                                   |
| 56805              | Clitoroplasty for intersex state                                                                                              |
| 56810              | Perineoplasty, repair of perineum, nonobstetrical                                                                             |
| 57120              | Colpocleisis                                                                                                                  |
| 57110              | Vaginectomy; complete removal of vaginal wall                                                                                 |
| 57111              | Vaginectomy; with removal of paravaginal tissue (radical vaginectomy)                                                         |
| 15757              | Free skin flap with microvascular anastomosis                                                                                 |

|       |                                                                                                                                       |
|-------|---------------------------------------------------------------------------------------------------------------------------------------|
| 15756 | Free muscle/myocutaneous flap with microvascular anastomosis                                                                          |
| 15758 | Free fascial flap with microvascular anastomosis                                                                                      |
| 20969 | Free osteocutaneous flap with microvascular anastomosis                                                                               |
| 53420 | Urethroplasty, 2-stage reconstruction or repair of prostatic or membranous urethra; first stage                                       |
| 53425 | Urethroplasty, 2-stage reconstruction or repair of prostatic or membranous urethra; second stage                                      |
| 57106 | Vaginectomy, partial removal of vaginal wall;                                                                                         |
| 58150 | Total abdominal hysterectomy (corpus and cervix), with or without removal of tube(s), with or without removal of ovary(s)             |
| 58180 | Supracervical abdominal hysterectomy (subtotal hysterectomy), with or without removal of tube(s), with or without removal of ovary(s) |
| 58260 | Vaginal hysterectomy, for uterus 250 gms or less                                                                                      |
| 58262 | Vaginal hysterectomy, for uterus 250 g or less; with removal of tube(s), and/or ovary(s)                                              |
| 58275 | Vaginal hysterectomy, with total or partial vaginectomy                                                                               |
| 58290 | Vaginal hysterectomy, for uterus greater than 250 g                                                                                   |
| 58291 | Vaginal hysterectomy, for uterus greater than 250 g; with removal of tube(s) and/or ovary(s)                                          |
| 58541 | Laparoscopy, surgical, supracervical hysterectomy, for uterus 250 g or less;                                                          |
| 58542 | Laparoscopy, surgical, supracervical hysterectomy, for uterus 250 g or less; with removal of tube(s) and/or ovary(s)                  |
| 58543 | Laparoscopy, surgical, supracervical hysterectomy, for uterus greater than 250 g                                                      |
| 58544 | Laparoscopy, surgical, supracervical hysterectomy, for uterus greater than 250 g; with removal of tube(s) and/or ovary(s)             |
| 58550 | Laparoscopy, surgical, with vaginal hysterectomy, for uterus 250 g or less;                                                           |
| 58552 | Laparoscopy, surgical, with vaginal hysterectomy, for uterus 250 grams or less; with removal of tube(s) and/or ovary(s)               |
| 58553 | Laparoscopy, surgical, with vaginal hysterectomy, for uterus greater than 250 g                                                       |
| 58554 | Laparoscopy, surgical, with vaginal hysterectomy, for uterus greater than 250 grams; with removal of tube(s) and/or ovary(s)          |
| 58570 | Laparoscopy, surgical, with total hysterectomy, for uterus 250 g or less;                                                             |
| 58571 | Laparoscopy, surgical, with total hysterectomy, for uterus 250 g or less; with removal of tube(s) and/or ovary(s)                     |
| 58572 | Laparoscopy, surgical, with total hysterectomy, for uterus greater than 250 g;                                                        |
| 58573 | Laparoscopy, surgical, with total hysterectomy, for uterus greater than 250 g; with removal of tube(s) and/or ovary(s)                |
| 58661 | Laparoscopy, surgical, removal of tubes and/or ovaries                                                                                |
| 58662 | Laparoscopy, surgical, removal of lesions/cysts of ovaries and pelvis                                                                 |
| 58700 | Salpingectomy, partial or total, unilateral or bilateral                                                                              |
| 58720 | Salpingo-Oophorectomy, partial or total, unilateral or bilateral                                                                      |
| 58150 | TAH, w/w-o removal of tubes and/or ovaries                                                                                            |
| 58940 | Oophorectomy, partial or total, unilateral or bilateral                                                                               |
| 58925 | Ovarian cystectomy, unilateral or bilateral                                                                                           |
| 58120 | D&C (non-obstetrical)                                                                                                                 |
| 59160 | Postpartum curettage                                                                                                                  |
| 57410 | Pelvic examination under anesthesia                                                                                                   |
