# Supplementary material
Source: PubMed Central journal article supplement (PMC10015311)
Supplement: jama-e230878-s002.pdf [file jama-e230878-s002.pdf]

Schoenbrunner A, Beckmeyer A, Kunnath N, et al. Association between California's state insurance gender nondiscrimination act and utilization of gender-affirming surgery. *JAMA*. Published March 14, 2023. doi:10.1001/jama.2023.0878

## **Data Sharing Statement**

### **Data**

**Data available:** No

### **Additional Information**

**Explanation for why data not available:** The data that support the findings of this study are available from HCUP and California HCAI. Restrictions apply to the availability of these data, which were used under license for this study.
